# Supplementary material for: Charge transfer properties of novel linear carbon chain-based dyes
Source: Royal Society of Chemistry journal article supplement (doi:10.1039/d3tc03740a), 2023-12-08
Supplement: d3tc03740a1.pdf [file d3tc03740a1.pdf]

# Charge transfer properties of novel linear carbon chain-based dyes

Giuseppe Consiglio<sup>a</sup>, Adam Gorczyński<sup>b</sup>, Salvatore Petralia<sup>c</sup> and Giuseppe Forte<sup>\*c</sup>

<sup>a</sup> Department of Chemical Science University of Catania, Via S. Sofia 64, 95125, Italy,

<sup>b</sup> Faculty of Chemistry, Adam Mickiewicz University, Uniwersytetu Poznańskiego 8, 61-614 Poznań, Poland

<sup>c</sup> Department of Drug Science and Health University of Catania, Via S. Sofia 64, 95125, Italy.

Email [gforte@unict.it](mailto:gforte@unict.it)

Electronic Supplementary Information:

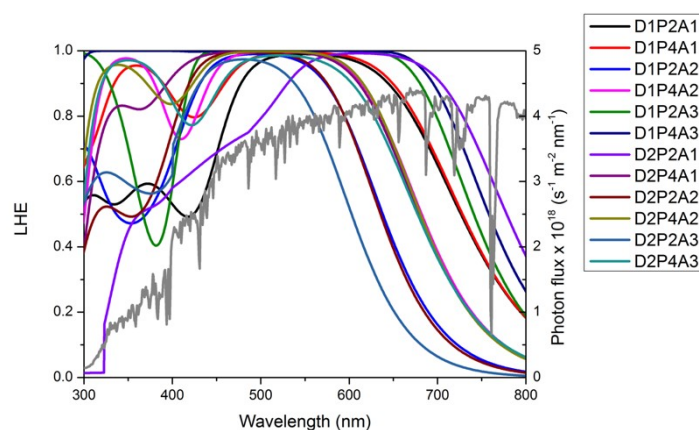

Figure 1: LHE curves of all dyes ( $I = 20 \text{ nmol cm}^{-2}$ ). AM 1.5G solar spectrum is reported in grey.

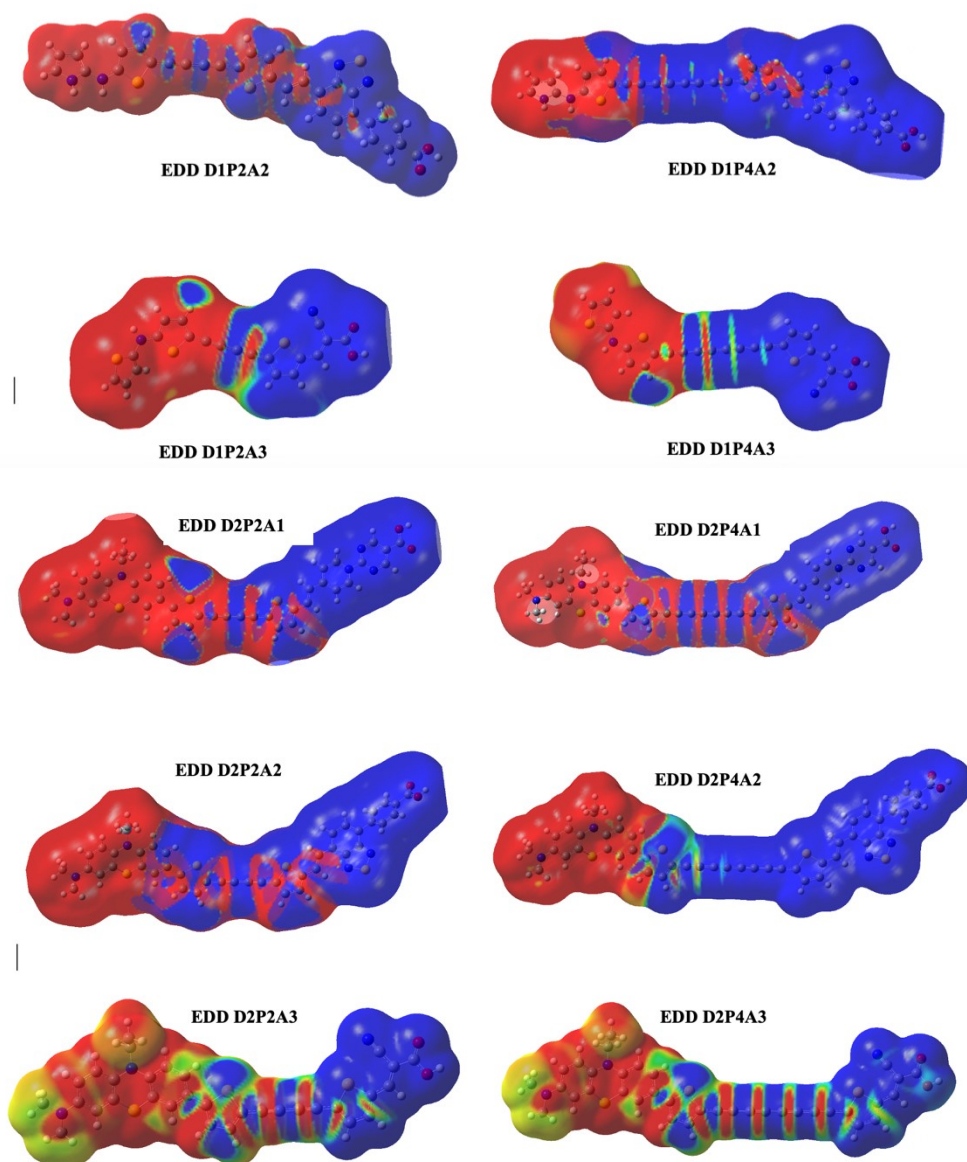

Figure 2. Electron density difference (EDD) maps of  $D_xP_yA_z$  ( $x=1,2$ ,  $y=2,4$ ,  $z=2,3$ ) dyes simulated by Gaussview (the red and blue colors indicate a decrease and increase of charge densities respectively). The density differences are 0.0001 a.u.

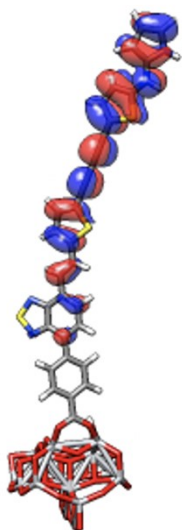

D1P2A2@TiO2 H

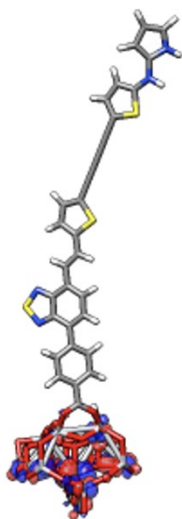

D1P2A2@TiO2 L

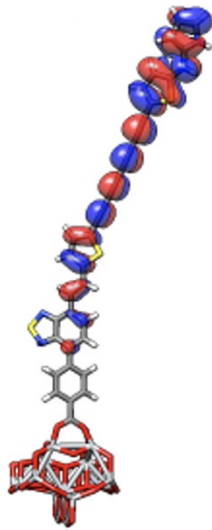

D1P4A2@TiO2 H

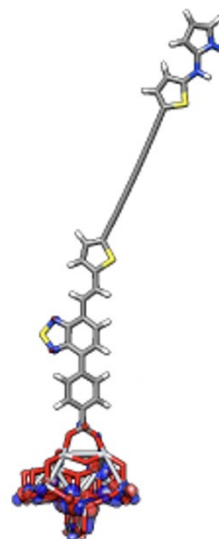

D1P4A2@TiO2 L

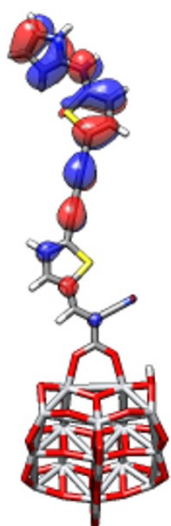

D1P2A3@TiO2 H

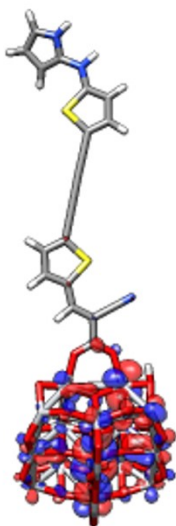

D1P2A3@TiO2 L

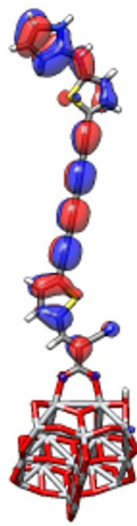

D1P4A3@TiO2 H

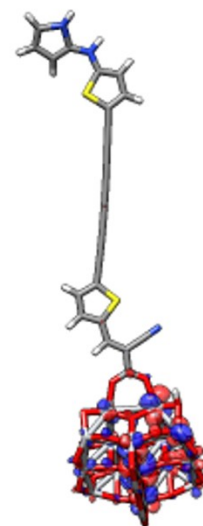

D1P4A3@TiO2 L

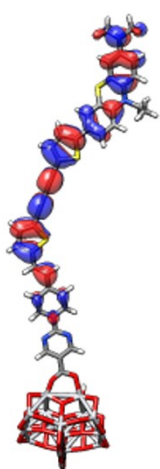

D2P2A1@TiO2 H

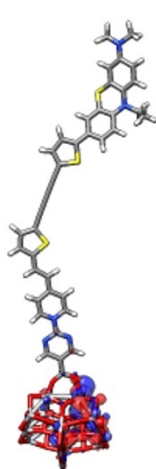

D2P2A1@TiO2 L

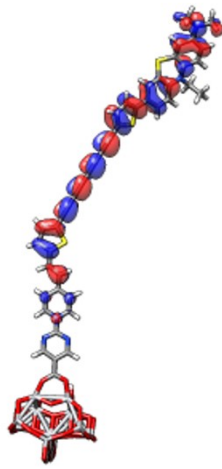

D2P4A1@TiO2 H

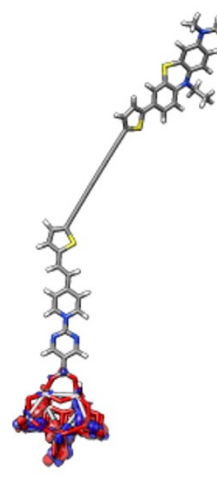

D2P4A1@TiO2 L

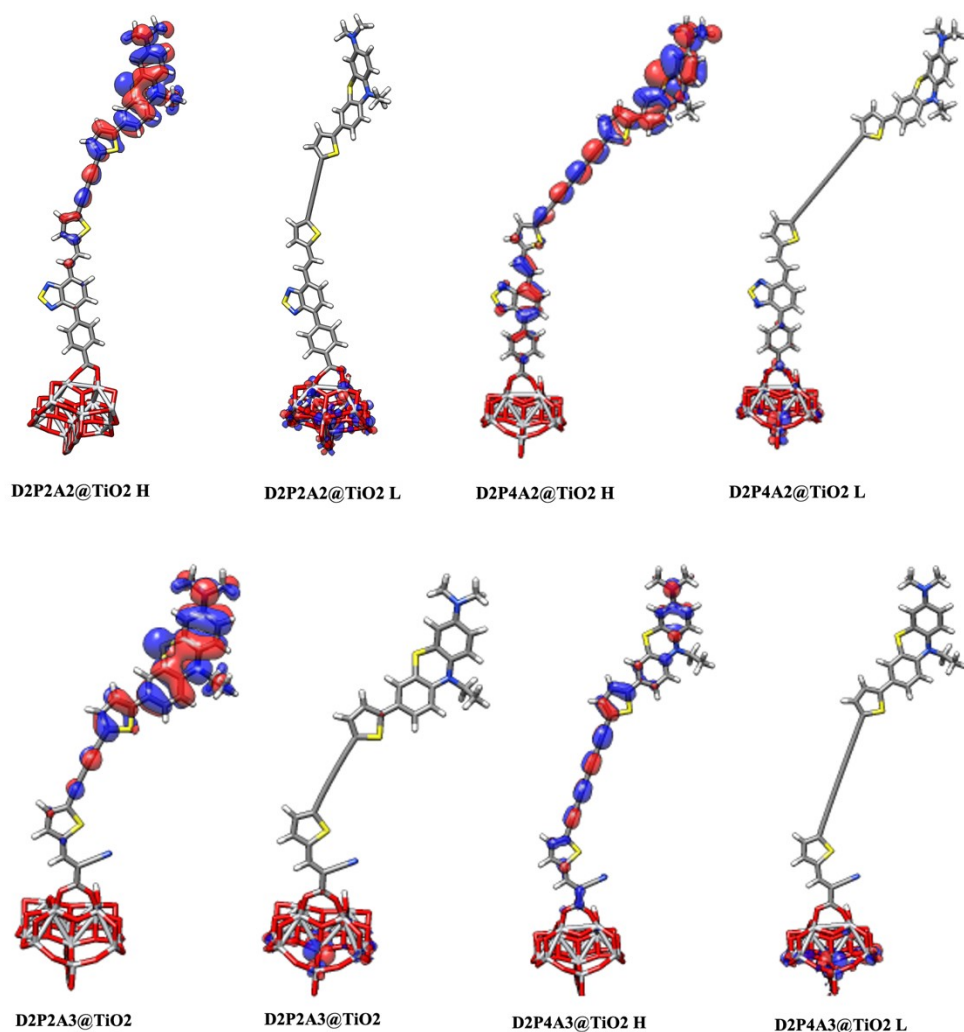

Figure 3: Optimized geometries of bidentate binding mode of  $D_xP_yA_z$  ( $x=1,2, y=2,4, z=2,3$ ) dyes on  $(TiO_2)_{14}$ . HOMOs (H) and LUMOs (L) are also visualized.

### Optimized geometries of Dyes

#### D1P2A1

|   |             |             |             |
|---|-------------|-------------|-------------|
| C | 4.97764400  | 1.19180800  | -0.01856000 |
| C | 3.67505900  | 1.52522100  | 0.00116300  |
| C | 1.14675900  | 2.17493200  | 0.01893500  |
| C | 0.58356300  | 3.44488400  | -0.01886600 |
| S | -0.09923600 | 0.94185100  | 0.06544000  |
| C | -0.81303900 | 3.42635400  | -0.01455300 |
| H | 1.18524900  | 4.34242200  | -0.05017700 |
| C | -1.36718900 | 2.15345100  | 0.02882000  |
| H | -1.42869300 | 4.31618500  | -0.04230200 |
| C | -2.75726600 | 1.86138700  | 0.03281000  |
| H | -3.38662600 | 2.74432500  | -0.01362600 |
| C | -3.33272700 | 0.62791600  | 0.08396100  |
| H | -2.70551400 | -0.25605200 | 0.13787800  |
| C | -4.74148200 | 0.37594800  | 0.06707600  |
| C | -5.73709400 | 1.37983700  | -0.01385000 |

|   |              |             |             |
|---|--------------|-------------|-------------|
| C | -5.20883400  | -0.95834000 | 0.12676700  |
| C | -7.05862400  | 1.05456100  | -0.03771500 |
| H | -5.48233900  | 2.42901300  | -0.05754500 |
| C | -6.54109900  | -1.24560800 | 0.10382600  |
| H | -4.50635300  | -1.77890000 | 0.18915200  |
| H | -7.84075700  | 1.79338700  | -0.09783300 |
| H | -6.92581300  | -2.25147500 | 0.14536700  |
| N | -7.47138200  | -0.24884900 | 0.01760000  |
| C | -8.87425500  | -0.56248800 | -0.00762800 |
| C | -10.99536100 | 0.16716600  | -0.21196100 |
| C | -10.49629400 | -2.11961600 | 0.15346300  |
| C | -11.46221000 | -1.13332600 | -0.03377400 |
| H | -11.68489600 | 0.98823300  | -0.36782100 |
| H | -10.76765600 | -3.15840000 | 0.29595800  |
| N | -9.19612500  | -1.83343100 | 0.16980000  |
| N | -9.69800800  | 0.45661600  | -0.20118600 |
| C | -12.92091900 | -1.40127700 | -0.05478700 |
| O | -13.76202100 | -0.54333200 | -0.19606100 |
| O | -13.21154000 | -2.70342100 | 0.09759200  |
| H | -14.18099000 | -2.80601500 | 0.07004700  |
| C | 2.49360100   | 1.83320800  | 0.01409300  |
| C | 6.16370300   | 0.89292400  | -0.04083500 |
| C | 7.49899200   | 0.53521800  | -0.06479300 |
| C | 9.68426200   | -0.72615600 | -0.05697500 |
| C | 9.83850600   | 0.64544300  | -0.19840000 |
| H | 10.79894600  | 1.12474100  | -0.30755300 |
| S | 7.99404100   | -1.16152900 | 0.09138500  |
| C | 8.61939500   | 1.33574300  | -0.20593800 |
| H | 8.54144700   | 2.40908800  | -0.31923700 |
| C | 12.01040600  | -1.51436000 | 0.04673500  |
| C | 12.79371300  | -0.54052300 | 0.63502300  |
| C | 14.14985700  | -0.90472500 | 0.39335700  |
| H | 12.44049800  | 0.31471300  | 1.18725000  |
| C | 14.14913000  | -2.08092100 | -0.31796400 |
| H | 15.02481700  | -0.36230700 | 0.71705900  |
| H | 14.95623100  | -2.69062200 | -0.68925400 |
| N | 12.84019300  | -2.43927700 | -0.53043900 |
| H | 12.53117000  | -3.24831600 | -1.05128100 |
| N | 10.62826300  | -1.70452000 | -0.01550000 |
| H | 10.31310300  | -2.66688000 | -0.00602700 |

#### D1P4A1

|   |             |            |            |
|---|-------------|------------|------------|
| C | -7.69346600 | 0.69384300 | 0.02796800 |
| C | -6.38367900 | 0.95935000 | 0.03546600 |
| C | 1.20333000  | 2.51099600 | 0.04394800 |
| C | 1.83895700  | 3.74449300 | 0.04394200 |
| S | 2.37266800  | 1.20492900 | 0.03935300 |
| C | 3.23379000  | 3.64218500 | 0.04018200 |
| H | 1.29109000  | 4.67631100 | 0.04640300 |
| C | 3.70662400  | 2.33774000 | 0.03781200 |

|   |              |             |             |
|---|--------------|-------------|-------------|
| H | 3.90250000   | 4.49311600  | 0.03951600  |
| C | 5.08105200   | 1.95986100  | 0.03412000  |
| H | 5.76318000   | 2.80426100  | 0.03135400  |
| C | 5.57507300   | 0.69434800  | 0.03316100  |
| H | 4.89451100   | -0.15158800 | 0.03585500  |
| C | 6.97005400   | 0.35429400  | 0.02702000  |
| C | 8.02412200   | 1.29694400  | 0.02310000  |
| C | 7.35053800   | -1.00640600 | 0.02362500  |
| C | 9.32498200   | 0.89166800  | 0.01430300  |
| H | 7.83391100   | 2.36027000  | 0.02587800  |
| C | 8.66411100   | -1.37450900 | 0.01454500  |
| H | 6.59833900   | -1.78397800 | 0.02780800  |
| H | 10.15290200  | 1.58138100  | 0.00987100  |
| H | 8.98675300   | -2.40266100 | 0.01102300  |
| N | 9.65328400   | -0.43495800 | 0.00913300  |
| C | 11.03648200  | -0.83723800 | -0.00554800 |
| C | 13.20597400  | -0.23512200 | -0.00445800 |
| C | 12.54626400  | -2.50980400 | -0.05901800 |
| C | 13.58016000  | -1.57624900 | -0.04505500 |
| H | 13.95221400  | 0.55040200  | 0.01131600  |
| H | 12.74364500  | -3.57428100 | -0.08624500 |
| N | 11.26760000  | -2.13882600 | -0.03858600 |
| N | 11.93004200  | 0.13921000  | 0.01481400  |
| C | 15.01854700  | -1.93974900 | -0.07314300 |
| O | 15.91884700  | -1.13314200 | -0.02992300 |
| O | 15.21577300  | -3.26523100 | -0.15447600 |
| H | 16.17663600  | -3.43225800 | -0.16695400 |
| C | -5.17960400  | 1.20718500  | 0.03786300  |
| C | -3.87215200  | 1.47754900  | 0.04262600  |
| C | -2.67044900  | 1.72801600  | 0.04377700  |
| C | -1.35721900  | 1.99724600  | 0.04584200  |
| C | -0.16169300  | 2.24683600  | 0.04542600  |
| C | -8.89738400  | 0.45904500  | 0.02297900  |
| C | -10.24899900 | 0.18574100  | 0.01599300  |
| C | -12.51501300 | -0.92155200 | 0.06191400  |
| C | -12.57828700 | 0.46366300  | -0.01896100 |
| H | -13.50611500 | 1.01347600  | -0.04391200 |
| S | -10.85536300 | -1.48193800 | 0.08645600  |
| C | -11.31712900 | 1.06773200  | -0.03799300 |
| H | -11.16704800 | 2.13830100  | -0.08358300 |
| C | -14.88358900 | -1.57545100 | -0.05992900 |
| C | -15.57137900 | -0.64440800 | -0.81359300 |
| C | -16.95854800 | -0.90418600 | -0.61794600 |
| H | -15.13746500 | 0.11278300  | -1.44523900 |
| C | -17.06977100 | -1.97816800 | 0.23256000  |
| H | -17.77877700 | -0.36262300 | -1.06342400 |
| H | -17.93204400 | -2.49252500 | 0.62351800  |
| N | -15.79940900 | -2.37368000 | 0.57351200  |
| H | -15.57050700 | -3.13290000 | 1.20020400  |
| N | -13.52212000 | -1.83091600 | 0.11791400  |
| H | -13.27352700 | -2.79951700 | 0.27617500  |

## D1P2A2

|   |              |             |             |
|---|--------------|-------------|-------------|
| C | 8.42134100   | 0.35485900  | -0.04872300 |
| C | 10.72992500  | -0.66677600 | -0.01964100 |
| C | 10.74017500  | 0.71447400  | -0.09632200 |
| H | 11.64479000  | 1.29937600  | -0.15528300 |
| S | 9.09111800   | -1.28390200 | 0.05960900  |
| C | 9.44958400   | 1.27288100  | -0.11748300 |
| H | 9.26079500   | 2.33595900  | -0.18997300 |
| C | 13.12053700  | -1.23919700 | 0.14008400  |
| C | 13.78508900  | -0.18522900 | 0.73737100  |
| C | 15.17986400  | -0.43954100 | 0.58214300  |
| H | 13.33281900  | 0.65161500  | 1.24267800  |
| C | 15.31900100  | -1.62903300 | -0.09046900 |
| H | 15.98580900  | 0.18526500  | 0.93538800  |
| H | 16.19368600  | -2.17783800 | -0.39810600 |
| N | 14.05713200  | -2.10345700 | -0.36312600 |
| H | 13.84838800  | -2.95389400 | -0.86739100 |
| N | 11.76802200  | -1.55117500 | 0.00438100  |
| H | 11.54582700  | -2.53602600 | -0.06131300 |
| C | 7.04899700   | 0.56558300  | -0.06067800 |
| C | 5.83965100   | 0.73521300  | -0.07038400 |
| C | 4.50394400   | 0.92978500  | -0.08135600 |
| C | 3.29825700   | 1.11298000  | -0.09110000 |
| C | -4.40601200  | 0.66165100  | -0.09122700 |
| C | -5.51763400  | 1.57064300  | -0.08544900 |
| C | -4.74408800  | -0.67980600 | -0.08427200 |
| C | -6.88700600  | 1.09865700  | -0.05305800 |
| C | -6.07901300  | -1.13804400 | -0.06050000 |
| H | -3.96412600  | -1.43066700 | -0.08814400 |
| C | -7.17838100  | -0.30200000 | -0.03501300 |
| H | -6.23686400  | -2.20935000 | -0.03604000 |
| C | -8.55523200  | -0.83542000 | 0.00694100  |
| C | -8.89152700  | -1.98206000 | -0.73102500 |
| C | -9.55029700  | -0.24014900 | 0.79693900  |
| C | -10.16876200 | -2.51353300 | -0.67868200 |
| H | -8.14932900  | -2.44921100 | -1.36625800 |
| C | -10.82807200 | -0.77436700 | 0.85503000  |
| H | -9.31838100  | 0.63645300  | 1.38556900  |
| C | -11.15155300 | -1.91617400 | 0.11575100  |
| H | -10.41643200 | -3.39238800 | -1.25992500 |
| H | -11.57389100 | -0.30398400 | 1.48138500  |
| C | -12.50565800 | -2.51730200 | 0.14439300  |
| O | -12.83578500 | -3.50924300 | -0.47248100 |
| O | -13.37088700 | -1.85121500 | 0.93833700  |
| H | -14.22589500 | -2.31585300 | 0.89585100  |
| N | -5.42342100  | 2.90348500  | -0.12073200 |
| N | -7.78007200  | 2.09642000  | -0.07554000 |
| S | -6.94157400  | 3.49027800  | -0.12055000 |
| C | -0.58846000  | 1.03436700  | -0.10344100 |

|   |             |             |             |
|---|-------------|-------------|-------------|
| C | 1.91857500  | 1.31408600  | -0.10107700 |
| C | 1.22214300  | 2.51237600  | -0.12861600 |
| H | 1.72479500  | 3.46988500  | -0.14686200 |
| S | 0.79785300  | -0.03227500 | -0.07720100 |
| C | -0.17136600 | 2.35367200  | -0.13006700 |
| H | -0.86142800 | 3.18645500  | -0.14961900 |
| C | -1.91374400 | 0.47091100  | -0.09328600 |
| C | -3.05584300 | 1.19365900  | -0.10349300 |
| H | -1.96623400 | -0.61302700 | -0.07386300 |
| H | -2.98753900 | 2.27536500  | -0.11931600 |

#### D1P4A2

|   |              |             |             |
|---|--------------|-------------|-------------|
| C | 11.39271300  | 0.11112800  | -0.05203400 |
| C | 13.78046600  | -0.70458200 | -0.00219500 |
| C | 13.66903800  | 0.67800400  | -0.00568700 |
| H | 14.52025900  | 1.34073400  | -0.00191400 |
| S | 12.20341400  | -1.46812000 | -0.01451600 |
| C | 12.34002600  | 1.12027800  | -0.03901100 |
| H | 12.05843000  | 2.16483700  | -0.05944100 |
| C | 16.20908500  | -1.04380200 | 0.18866700  |
| C | 16.75495300  | 0.01757200  | 0.88395100  |
| C | 18.16830100  | -0.07083100 | 0.72283800  |
| H | 16.21298600  | 0.75371600  | 1.45385700  |
| C | 18.43554000  | -1.17558500 | -0.04970600 |
| H | 18.90195200  | 0.60258300  | 1.13860600  |
| H | 19.36496000  | -1.59822800 | -0.39384500 |
| N | 17.23384700  | -1.75580200 | -0.37723800 |
| H | 17.11778500  | -2.57621000 | -0.95587000 |
| N | 14.89564700  | -1.48372900 | 0.01100600  |
| H | 14.77374700  | -2.48419000 | -0.08215000 |
| C | 8.79217200   | 0.29107800  | -0.10955700 |
| C | 7.45743800   | 0.39643000  | -0.13221300 |
| C | 6.23373000   | 0.50132400  | -0.14627000 |
| C | 4.90255800   | 0.62969200  | -0.15894000 |
| C | 3.68246300   | 0.75973600  | -0.16338500 |
| C | 2.34918600   | 0.91376200  | -0.16714200 |
| C | 1.13780900   | 1.07174900  | -0.16320400 |
| C | 10.01462300  | 0.20992800  | -0.08425400 |
| C | -6.55768900  | 0.57979900  | -0.08237200 |
| C | -7.66788800  | 1.48951200  | -0.06416900 |
| C | -6.89491100  | -0.76149800 | -0.07760100 |
| C | -9.03664700  | 1.01751300  | -0.02515500 |
| C | -8.22977300  | -1.22009700 | -0.04772300 |
| H | -6.11458900  | -1.51197800 | -0.08593000 |
| C | -9.32796600  | -0.38333100 | -0.01206400 |
| H | -8.38798800  | -2.29136700 | -0.02638300 |
| C | -10.70510700 | -0.91575600 | 0.03620700  |
| C | -11.04769400 | -2.05583000 | -0.70863900 |
| C | -11.69291000 | -0.32588000 | 0.83896900  |
| C | -12.32526500 | -2.58611100 | -0.65127700 |



|   |              |             |             |
|---|--------------|-------------|-------------|
| H | -10.31049200 | -2.51858000 | -1.35287000 |
| C | -12.97083200 | -0.85922000 | 0.90226300  |
| H | -11.45524100 | 0.54528500  | 1.43334800  |
| C | -13.30107500 | -1.99416800 | 0.15556600  |
| H | -12.57842100 | -3.45985100 | -1.23783000 |
| H | -13.71129800 | -0.39355400 | 1.53838600  |
| C | -14.65582900 | -2.59419100 | 0.18954200  |
| O | -14.99154200 | -3.58026000 | -0.43351100 |
| O | -15.51364500 | -1.93487300 | 0.99686800  |
| H | -16.36940600 | -2.39845900 | 0.95769000  |
| N | -7.57358600  | 2.82255300  | -0.09209500 |
| N | -9.92990800  | 2.01521800  | -0.03524500 |
| S | -9.09176200  | 3.40904400  | -0.07741700 |
| C | -2.74213000  | 0.95880600  | -0.13752300 |
| C | -0.24071400  | 1.25576600  | -0.15539700 |
| C | -0.94524700  | 2.45103800  | -0.14275600 |
| H | -0.44792800  | 3.41143600  | -0.14103500 |
| S | -1.35247300  | -0.09932100 | -0.15572100 |
| C | -2.33535800  | 2.28320900  | -0.13287900 |
| H | -3.03148300  | 3.11087300  | -0.12287300 |
| C | -4.06535400  | 0.38884700  | -0.12697200 |
| C | -5.20706800  | 1.11119000  | -0.10037000 |
| H | -4.11568900  | -0.69518500 | -0.13982700 |
| H | -5.13882400  | 2.19301100  | -0.08834800 |

#### D1P2A3

|   |              |             |             |
|---|--------------|-------------|-------------|
| C | 1.74465013   | 0.72886806  | 0.04718000  |
| C | 0.59326704   | 0.31820002  | 0.03262300  |
| C | -0.67502505  | -0.12070501 | 0.01275000  |
| C | -1.82804614  | -0.51918004 | -0.00702500 |
| C | -3.14746324  | -0.95168208 | -0.03198400 |
| C | -3.62419428  | -2.25811517 | -0.08702101 |
| S | -4.45650634  | 0.19423701  | 0.00451600  |
| C | -5.01403838  | -2.32402818 | -0.10121901 |
| H | -2.96718822  | -3.11349624 | -0.11586901 |
| C | -5.64705543  | -1.08336808 | -0.05687500 |
| H | -5.57634840  | -3.24569725 | -0.14301401 |
| C | -7.05366756  | -0.93282607 | -0.06484900 |
| H | -7.58369456  | -1.87527114 | -0.11491801 |
| C | -7.84069362  | 0.18651901  | -0.02028900 |
| C | -7.31311353  | 1.50130211  | 0.05373100  |
| C | -9.31356271  | 0.11647601  | -0.04213300 |
| O | -9.79099473  | -1.13864309 | -0.11514001 |
| H | -10.76089985 | -1.08624908 | -0.12493401 |
| O | -10.03561776 | 1.08922909  | 0.00033300  |
| N | -6.87850650  | 2.56893319  | 0.11457801  |
| C | 3.04972023   | 1.18230109  | 0.06109500  |
| C | 3.52113127   | 2.48536519  | 0.05538100  |
| S | 4.40205834   | 0.04905300  | 0.10813001  |
| C | 4.91363938   | 2.58848220  | 0.09164601  |

|   |             |             |             |
|---|-------------|-------------|-------------|
| H | 2.85473822  | 3.33489425  | 0.02742700  |
| C | 5.54816141  | 1.35453911  | 0.11296001  |
| H | 5.46090939  | 3.51942127  | 0.08997101  |
| H | 7.44229559  | 2.00939215  | -0.04396000 |
| C | 7.58597457  | -0.03810800 | 0.15648001  |
| C | 7.32349456  | -1.15227909 | 0.90806707  |
| S | 8.98699071  | -0.28026902 | -0.85360007 |
| C | 8.26143663  | -2.19684917 | 0.67963805  |
| H | 6.51913250  | -1.21528809 | 1.62450712  |
| C | 9.22589968  | -1.86876915 | -0.22408202 |
| H | 8.22907464  | -3.14699724 | 1.19244209  |
| H | 10.07125579 | -2.45308319 | -0.54889604 |
| N | 6.89848453  | 1.16856309  | 0.09606701  |

#### D1P4A3

|   |              |             |             |
|---|--------------|-------------|-------------|
| C | -4.26104730  | -1.12322208 | -0.00083200 |
| C | -3.06220622  | -0.85332206 | -0.00171600 |
| C | -1.75938413  | -0.56007604 | -0.00192500 |
| C | -0.55859904  | -0.28590102 | -0.00319800 |
| C | 0.74140205   | 0.01329000  | -0.00331900 |
| C | 1.93959114   | 0.29054802  | -0.00416300 |
| C | 3.24432023   | 0.59358304  | -0.00355000 |
| C | 4.43536632   | 0.87284706  | -0.00329700 |
| C | 5.79175641   | 1.18213308  | -0.00224900 |
| C | 6.38302446   | 2.44184518  | -0.00119700 |
| S | 6.99879251   | -0.09057801 | -0.00187500 |
| C | 7.77957058   | 2.38496817  | 0.00002400  |
| H | 5.80350044   | 3.35458024  | -0.00123100 |
| C | 8.29996057   | 1.09209308  | -0.00007300 |
| H | 8.42156762   | 3.25684023  | 0.00104500  |
| C | 9.69531372   | 0.82018706  | 0.00134900  |
| H | 10.30461772  | 1.71780213  | 0.00251100  |
| C | 10.38298876  | -0.36445603 | 0.00158400  |
| C | 9.74618570   | -1.63484812 | 0.00017400  |
| C | 11.86196286  | -0.41677003 | 0.00334200  |
| O | 12.43678387  | 0.80091506  | 0.00440900  |
| H | 13.40221495  | 0.67761005  | 0.00565400  |
| O | 12.50189591  | -1.44832610 | 0.00382200  |
| N | 9.22319765   | -2.66712019 | -0.00104000 |
| C | -5.61081139  | -1.40808410 | -0.00024500 |
| C | -6.25433744  | -2.64125319 | 0.00017000  |
| S | -6.81348549  | -0.09689201 | 0.00016300  |
| C | -7.64884755  | -2.56166618 | 0.00069700  |
| H | -5.70325241  | -3.57257026 | 0.00004700  |
| C | -8.12461256  | -1.25145909 | 0.00071400  |
| H | -8.31316561  | -3.41606124 | 0.00103300  |
| H | -10.06379571 | -1.72690412 | 0.00147900  |
| C | -10.06467674 | 0.32250402  | 0.00120900  |
| C | -9.54867071  | 1.59621112  | 0.00112400  |
| S | -11.82299684 | 0.35361103  | 0.00142600  |

|   |              |             |            |
|---|--------------|-------------|------------|
| C | -10.56775576 | 2.59822519  | 0.00124100 |
| H | -8.49827663  | 1.84308413  | 0.00103500 |
| C | -11.83289886 | 2.09626015  | 0.00141400 |
| H | -10.35136476 | 3.65892826  | 0.00120700 |
| H | -12.77743490 | 2.61931719  | 0.00154600 |
| N | -9.44842369  | -0.92051006 | 0.00114600 |

#### D2P2A1

|   |             |             |             |
|---|-------------|-------------|-------------|
| C | 13.36563800 | -2.11646100 | 0.41325000  |
| C | 12.04920500 | -2.56036500 | 0.43057300  |
| C | 10.98783200 | -1.77831100 | -0.03816700 |
| C | 11.33034700 | -0.51138000 | -0.52776300 |
| C | 12.63637800 | -0.03911900 | -0.51469900 |
| C | 13.70196500 | -0.82942800 | -0.04230500 |
| C | 8.64918100  | -0.05814600 | -0.47105500 |
| C | 8.55793300  | -1.39167200 | -0.01214700 |
| C | 7.29501300  | -1.80665900 | 0.45088900  |
| H | 7.14971500  | -2.81302100 | 0.81110100  |
| C | 6.20648700  | -0.95133800 | 0.46774600  |
| C | 7.56907800  | 0.80433400  | -0.41157800 |
| H | 14.12746200 | -2.79079800 | 0.77626900  |
| H | 11.86975800 | -3.55365000 | 0.81322100  |
| H | 12.81913600 | 0.95344300  | -0.90099100 |
| N | 15.00732900 | -0.35054200 | -0.00977200 |
| H | 5.26619900  | -1.33568400 | 0.84589800  |
| H | 7.69426100  | 1.81490900  | -0.78026000 |
| C | 9.42242700  | -3.69538500 | 0.15954700  |
| C | 9.35206100  | -4.16675800 | 1.61466100  |
| H | 10.22130400 | -4.22221100 | -0.36216000 |
| H | 8.49906400  | -3.95505200 | -0.35892100 |
| H | 9.17864100  | -5.24615800 | 1.62845100  |
| H | 10.27650200 | -3.96913700 | 2.15838800  |
| H | 8.53829300  | -3.69054700 | 2.16283500  |
| N | 9.64935300  | -2.25558600 | -0.04806200 |
| S | 10.10526400 | 0.50414400  | -1.32064800 |
| C | 16.08859800 | -1.31260800 | 0.16254400  |
| C | 15.33939000 | 0.82117600  | -0.81062900 |
| H | 16.14860900 | -2.03453500 | -0.66450400 |
| H | 15.97453900 | -1.86677300 | 1.09497400  |
| H | 17.03164400 | -0.77130500 | 0.21599000  |
| H | 15.20463700 | 0.64876700  | -1.88825700 |
| H | 16.38133400 | 1.08160600  | -0.63213200 |
| H | 14.73318200 | 1.68066600  | -0.52137200 |
| C | 6.31162400  | 0.38079300  | 0.05011800  |
| C | 0.30488200  | 2.73220900  | 0.23268000  |
| C | -1.03134800 | 2.90365200  | 0.27166300  |
| C | -3.62658300 | 3.18474100  | 0.32152400  |
| C | -4.38067900 | 4.34798400  | 0.37726500  |
| S | -4.66109800 | 1.77124100  | 0.26427500  |
| C | -5.75890600 | 4.10868800  | 0.37264400  |

|   |              |             |             |
|---|--------------|-------------|-------------|
| H | -3.92833500  | 5.32890300  | 0.41750900  |
| C | -6.10217000  | 2.76564000  | 0.31349800  |
| H | -6.50791100  | 4.88918100  | 0.40860000  |
| C | -7.43053600  | 2.25378900  | 0.28106400  |
| H | -8.19518400  | 3.02371900  | 0.31403600  |
| C | -7.79404100  | 0.94609300  | 0.20221200  |
| H | -7.03024100  | 0.17541700  | 0.16452700  |
| C | -9.14445500  | 0.46710400  | 0.14046600  |
| C | -10.29318800 | 1.29140300  | 0.18979900  |
| C | -9.37914600  | -0.92088300 | 0.01207000  |
| C | -11.54297700 | 0.75577200  | 0.10348400  |
| H | -10.21622900 | 2.36363300  | 0.29837800  |
| C | -10.64488500 | -1.42059800 | -0.07272000 |
| H | -8.54870800  | -1.61304800 | -0.02794000 |
| H | -12.43829400 | 1.35436700  | 0.13669500  |
| H | -10.85637100 | -2.47211400 | -0.17710600 |
| N | -11.72852700 | -0.59182000 | -0.03313600 |
| C | -13.05814200 | -1.13390800 | -0.13143300 |
| C | -15.27562500 | -0.75952900 | -0.24712700 |
| C | -14.38314400 | -2.95408500 | -0.24127500 |
| C | -15.50764700 | -2.13285500 | -0.28398600 |
| H | -16.09853300 | -0.05508700 | -0.27974100 |
| H | -14.46789600 | -4.03343300 | -0.26764900 |
| N | -13.15216700 | -2.45286400 | -0.16258600 |
| N | -14.04778700 | -0.25535000 | -0.16986300 |
| C | -16.89793700 | -2.64493800 | -0.36326800 |
| O | -17.87802400 | -1.93621400 | -0.37807700 |
| O | -16.95509300 | -3.98551200 | -0.41631300 |
| H | -17.89333500 | -4.24857800 | -0.46312400 |
| C | -2.24110900  | 3.05131200  | 0.30043000  |
| C | 1.51288100   | 2.56758000  | 0.18798000  |
| C | 2.88381300   | 2.34372600  | 0.12853200  |
| C | 5.17969800   | 1.29760100  | 0.06589700  |
| C | 5.18648800   | 2.67777900  | -0.02234100 |
| H | 6.09692300   | 3.25660000  | -0.09524100 |
| S | 3.53798000   | 0.71252800  | 0.18634400  |
| C | 3.91058800   | 3.26332900  | 0.01426900  |
| H | 3.72910200   | 4.32858000  | -0.03382600 |

#### D2P4A1

|   |              |             |             |
|---|--------------|-------------|-------------|
| C | -15.76442200 | 2.34127900  | 0.32688800  |
| C | -14.56524900 | 2.60526400  | -0.32258200 |
| C | -13.58498800 | 1.62541000  | -0.51381400 |
| C | -13.87959400 | 0.35498400  | -0.00376400 |
| C | -15.05833500 | 0.08503000  | 0.67965400  |
| C | -16.05489000 | 1.06644700  | 0.84572900  |
| C | -11.23746100 | -0.12421500 | -0.40518000 |
| C | -11.20105000 | 1.19049700  | -0.92434700 |
| C | -9.92381800  | 1.72364600  | -1.18155500 |
| H | -9.81892400  | 2.71369200  | -1.59649200 |

|   |              |             |             |
|---|--------------|-------------|-------------|
| C | -8.76851000  | 1.01421100  | -0.90296400 |
| C | -10.07949900 | -0.81197900 | -0.09090900 |
| H | -16.46946600 | 3.15318100  | 0.42969800  |
| H | -14.40875300 | 3.61113900  | -0.68141700 |
| H | -15.20426900 | -0.91476200 | 1.06301900  |
| N | -17.26353200 | 0.77919600  | 1.46776300  |
| H | -7.81950000  | 1.49414400  | -1.11280800 |
| H | -10.16897000 | -1.81485700 | 0.30760000  |
| C | -12.27692500 | 3.14339500  | -1.98011600 |
| C | -11.88832800 | 4.41058400  | -1.21241900 |
| H | -13.24547400 | 3.28374400  | -2.45976800 |
| H | -11.56209900 | 2.96431600  | -2.78363600 |
| H | -11.86284500 | 5.25130500  | -1.91094600 |
| H | -12.60252900 | 4.65114700  | -0.42432400 |
| H | -10.90329000 | 4.32822300  | -0.75196900 |
| N | -12.36588100 | 1.90304600  | -1.19105000 |
| S | -12.77789700 | -1.00610300 | -0.31026500 |
| C | -18.10263200 | 1.89048100  | 1.89742100  |
| C | -17.36463500 | -0.43375000 | 2.26894400  |
| H | -18.38483000 | 2.51875000  | 1.05123500  |
| H | -17.61232400 | 2.52470000  | 2.64979500  |
| H | -19.01798500 | 1.48995700  | 2.32945600  |
| H | -17.15547100 | -1.31960400 | 1.66760400  |
| H | -18.38392500 | -0.52286800 | 2.64042800  |
| H | -16.67980500 | -0.43113800 | 3.12915100  |
| C | -8.80767900  | -0.26379000 | -0.33114300 |
| C | -2.64345100  | -2.14468000 | 0.11448900  |
| C | -1.31313200  | -2.29027600 | 0.04809700  |
| C | 6.38624400   | -3.01466900 | -0.34179400 |
| C | 7.14687100   | -4.14499500 | -0.59952200 |
| S | 7.41079300   | -1.61444200 | -0.09087700 |
| C | 8.52311800   | -3.89170200 | -0.59703600 |
| H | 6.70052400   | -5.11261900 | -0.78168100 |
| C | 8.85404400   | -2.56969500 | -0.34040300 |
| H | 9.27733400   | -4.64614000 | -0.77818200 |
| C | 10.18222100  | -2.04849300 | -0.28603400 |
| H | 10.94982000  | -2.79463700 | -0.46454800 |
| C | 10.53471100  | -0.76231500 | -0.03612400 |
| H | 9.76654800   | -0.01818800 | 0.14915700  |
| C | 11.88393900  | -0.26833400 | 0.01349000  |
| C | 13.03431100  | -1.05325400 | -0.22586200 |
| C | 12.10754400  | 1.09196200  | 0.31766900  |
| C | 14.28067900  | -0.50462400 | -0.15946800 |
| H | 12.96372800  | -2.10340700 | -0.47005400 |
| C | 13.37039300  | 1.60556600  | 0.37755900  |
| H | 11.27305800  | 1.75248500  | 0.51105100  |
| H | 15.17934700  | -1.07184900 | -0.33843500 |
| H | 13.57514300  | 2.63805400  | 0.60854700  |
| N | 14.45677100  | 0.81628500  | 0.14116100  |
| C | 15.78513400  | 1.37354200  | 0.20851500  |
| C | 18.00584900  | 1.05973000  | 0.01265600  |

|   |             |             |             |
|---|-------------|-------------|-------------|
| C | 17.09270800 | 3.17030500  | 0.58203100  |
| C | 18.22458700 | 2.39790700  | 0.33172700  |
| H | 18.83493500 | 0.39441400  | -0.19692000 |
| H | 17.16710300 | 4.22020700  | 0.83675000  |
| N | 15.86602300 | 2.65576400  | 0.51995200  |
| N | 16.78209100 | 0.54260000  | -0.04949900 |
| C | 19.61038000 | 2.92602300  | 0.39147700  |
| O | 20.59668400 | 2.25689800  | 0.18565200  |
| O | 19.65404200 | 4.23183700  | 0.70031000  |
| H | 20.58912300 | 4.50916900  | 0.72149700  |
| C | -0.09434600 | -2.41667600 | -0.01456500 |
| C | 1.23434200  | -2.55136100 | -0.07931600 |
| C | 2.45309800  | -2.67016300 | -0.14184700 |
| C | 3.78731400  | -2.79353500 | -0.20757700 |
| C | 5.00087800  | -2.90740400 | -0.27153800 |
| C | -3.85731200 | -2.01235900 | 0.18135400  |
| C | -5.23284900 | -1.84451000 | 0.24739500  |
| C | -7.60209900 | -1.00766900 | 0.00462100  |
| C | -7.48174000 | -2.14608300 | 0.78345800  |
| H | -8.32587700 | -2.62219000 | 1.26249300  |
| S | -6.03217100 | -0.51386400 | -0.58123000 |
| C | -6.16673700 | -2.61329900 | 0.92078400  |
| H | -5.88813800 | -3.48252900 | 1.50119600  |

#### D2P2A2

|   |              |             |             |
|---|--------------|-------------|-------------|
| C | -14.29534100 | 1.87099200  | 0.76789600  |
| C | -13.01395400 | 2.40708700  | 0.73013800  |
| C | -11.94572500 | 1.75191100  | 0.10843200  |
| C | -12.24548800 | 0.51979800  | -0.48712900 |
| C | -13.51267800 | -0.04536600 | -0.42658800 |
| C | -14.58214400 | 0.61074600  | 0.21359600  |
| C | -9.55190600  | 0.22638900  | -0.61540900 |
| C | -9.50449200  | 1.51255800  | -0.03257300 |
| C | -8.24499300  | 1.94611900  | 0.41900700  |
| H | -8.12973300  | 2.92396600  | 0.85937400  |
| C | -7.12134200  | 1.14048700  | 0.32995100  |
| C | -8.43505100  | -0.58888700 | -0.66597700 |
| H | -15.06693400 | 2.44821200  | 1.25585500  |
| H | -12.86763700 | 3.36974900  | 1.19602000  |
| H | -13.66243000 | -1.00439600 | -0.90201100 |
| N | -15.84037700 | 0.02827300  | 0.31144900  |
| H | -6.18667100  | 1.53298200  | 0.71340200  |
| H | -8.53078800  | -1.56698700 | -1.12097800 |
| C | -10.48373200 | 3.73875500  | 0.39425800  |
| C | -10.35618200 | 4.08322700  | 1.88166700  |
| H | -11.34002000 | 4.26101900  | -0.03286000 |
| H | -9.60664600  | 4.10036700  | -0.14331000 |
| H | -10.26888900 | 5.16819600  | 1.98481800  |
| H | -11.22468700 | 3.76187500  | 2.45736000  |
| H | -9.47315200  | 3.63312100  | 2.33689800  |

|   |              |             |             |
|---|--------------|-------------|-------------|
| N | -10.64140800 | 2.31386400  | 0.05957200  |
| S | -11.01688000 | -0.31728900 | -1.46288900 |
| C | -16.96597600 | 0.86680400  | 0.70084800  |
| C | -16.16254800 | -1.08836700 | -0.56733100 |
| H | -17.17876200 | 1.65940900  | -0.03094400 |
| H | -16.78858200 | 1.33430400  | 1.67034900  |
| H | -17.85183100 | 0.24089700  | 0.79575800  |
| H | -16.13823200 | -0.81110200 | -1.63098800 |
| H | -17.16327300 | -1.44367800 | -0.32791000 |
| H | -15.47366900 | -1.92049500 | -0.41416900 |
| C | -7.18440500  | -0.15542200 | -0.19549500 |
| C | -1.11523100  | -2.38585800 | -0.10876700 |
| C | 0.21877400   | -2.57554100 | -0.01745500 |
| C | 1.42102600   | -2.75367500 | 0.07447200  |
| C | -2.32092400  | -2.22186200 | -0.18462100 |
| C | -3.69777100  | -2.02117600 | -0.26181100 |
| C | -6.02285300  | -1.03486100 | -0.25968700 |
| C | -5.98987700  | -2.39990400 | -0.46660000 |
| H | -6.88309600  | -2.99533000 | -0.59638500 |
| S | -4.39725800  | -0.41951100 | -0.07022600 |
| C | -4.69663000  | -2.95265200 | -0.46861900 |
| H | -4.48639100  | -4.00476700 | -0.60627800 |
| C | 8.43637400   | -0.42754600 | -0.06879000 |
| C | 9.62461700   | -1.18251400 | 0.22385000  |
| C | 8.65011500   | 0.90121900  | -0.39459300 |
| C | 10.93471000  | -0.55797500 | 0.18942800  |
| C | 9.92660400   | 1.50338600  | -0.43733500 |
| H | 7.78980700   | 1.51967900  | -0.62304700 |
| C | 11.09144300  | 0.82584000  | -0.14696300 |
| H | 9.97760600   | 2.55593300  | -0.68787100 |
| C | 12.40679700  | 1.49755000  | -0.18880100 |
| C | 12.68530300  | 2.43273800  | -1.19841300 |
| C | 13.39064000  | 1.25372600  | 0.78063700  |
| C | 13.89827700  | 3.09876500  | -1.23645000 |
| H | 11.95079100  | 2.62423900  | -1.97057700 |
| C | 14.60297300  | 1.92557900  | 0.74853000  |
| H | 13.19937000  | 0.54794500  | 1.57705400  |
| C | 14.86982200  | 2.85459800  | -0.26175400 |
| H | 14.10351900  | 3.80999800  | -2.02606900 |
| H | 15.34086200  | 1.72923700  | 1.51450800  |
| C | 16.15394900  | 3.59078300  | -0.33863300 |
| O | 16.43996700  | 4.39337300  | -1.20298900 |
| O | 17.00649100  | 3.28882000  | 0.66348900  |
| H | 17.81497300  | 3.81523900  | 0.52858700  |
| N | 9.67850000   | -2.48073800 | 0.53404200  |
| N | 11.92560200  | -1.41304600 | 0.46494000  |
| S | 11.24649200  | -2.86312200 | 0.75151900  |
| C | 5.29916800   | -2.64461100 | 0.24728100  |
| C | 2.79772900   | -2.94465800 | 0.18402000  |
| C | 3.48480100   | -4.10578100 | 0.48467200  |
| H | 2.98013600   | -5.04321500 | 0.67483200  |

|   |            |             |             |
|---|------------|-------------|-------------|
| S | 3.91931500 | -1.61364000 | -0.06516500 |
| C | 4.87899200 | -3.93371800 | 0.51834100  |
| H | 5.57796200 | -4.72997700 | 0.73915200  |
| C | 6.66454700 | -2.19381500 | 0.22803500  |
| C | 7.08037700 | -0.93666200 | -0.04453700 |
| H | 7.38966600 | -2.96407400 | 0.45911700  |
| H | 6.33538600 | -0.18063500 | -0.27992100 |

#### D2P4A2

|   |              |             |             |
|---|--------------|-------------|-------------|
| C | -16.86695100 | 1.88642700  | 0.79778500  |
| C | -15.59947900 | 2.45086400  | 0.72727400  |
| C | -14.52409300 | 1.80316000  | 0.10965300  |
| C | -14.80117800 | 0.54651200  | -0.44349500 |
| C | -16.05339100 | -0.04664300 | -0.34843800 |
| C | -17.13069500 | 0.60392300  | 0.28400900  |
| C | -12.10249300 | 0.31931300  | -0.61067700 |
| C | -12.07994000 | 1.62463200  | -0.06897200 |
| C | -10.82344500 | 2.10761500  | 0.34119700  |
| H | -10.72744200 | 3.10140300  | 0.74911200  |
| C | -9.67961700  | 1.33290000  | 0.25017600  |
| C | -10.96394600 | -0.46438300 | -0.66189500 |
| H | -17.64587600 | 2.45922600  | 1.27937900  |
| H | -15.46989800 | 3.42968800  | 1.16352100  |
| H | -16.18629700 | -1.02327700 | -0.79172900 |
| N | -18.37448900 | -0.00231700 | 0.41167700  |
| H | -8.74861500  | 1.76503800  | 0.59860100  |
| H | -11.04166100 | -1.45833600 | -1.08467100 |
| C | -13.10879900 | 3.83294400  | 0.32255900  |
| C | -12.96142200 | 4.21056200  | 1.79965000  |
| H | -13.98637900 | 4.32312300  | -0.09894200 |
| H | -12.25247400 | 4.20495300  | -0.24066600 |
| H | -12.89113700 | 5.29875900  | 1.87931300  |
| H | -13.81393800 | 3.88533600  | 2.39658800  |
| H | -12.06289100 | 3.78418000  | 2.24710600  |
| N | -13.23505000 | 2.39638800  | 0.02446700  |
| S | -13.56703000 | -0.29116000 | -1.41152800 |
| C | -19.51880000 | 0.82975700  | 0.76022300  |
| C | -18.66921600 | -1.16985000 | -0.40845600 |
| H | -19.73696900 | 1.59051900  | -0.00301700 |
| H | -19.35846600 | 1.33681300  | 1.71268100  |
| H | -20.39409000 | 0.19199600  | 0.87078500  |
| H | -18.65249500 | -0.94687900 | -1.48501200 |
| H | -19.66026600 | -1.53815500 | -0.14917200 |
| H | -17.95835000 | -1.97465600 | -0.21441800 |
| C | -9.71569400  | 0.01981200  | -0.23512800 |
| C | -3.58301800  | -2.01648700 | -0.19750800 |
| C | -2.25079800  | -2.15709500 | -0.13263000 |
| C | -1.03242200  | -2.28369500 | -0.06800700 |
| C | 0.29647100   | -2.42318100 | 0.00145000  |
| C | 1.51409500   | -2.55238200 | 0.06897500  |



|   |             |             |             |
|---|-------------|-------------|-------------|
| C | 2.84651500  | -2.69344200 | 0.14208700  |
| C | 4.05841000  | -2.82897300 | 0.21262800  |
| C | -4.79777400 | -1.89402900 | -0.25735900 |
| C | -6.17603100 | -1.73620100 | -0.32139200 |
| C | -8.52934000 | -0.82206600 | -0.30701200 |
| C | -8.45478800 | -2.18627700 | -0.52503400 |
| H | -9.32900400 | -2.80819500 | -0.65906300 |
| S | -6.92478200 | -0.15756100 | -0.11512200 |
| C | -7.14796200 | -2.69782000 | -0.53385700 |
| H | -6.90491000 | -3.74150300 | -0.68113400 |
| C | 10.98922100 | -0.26242300 | 0.01615300  |
| C | 12.20714100 | -1.00978500 | 0.17548100  |
| C | 11.15630400 | 1.09421300  | -0.20398000 |
| C | 13.49963400 | -0.35100500 | 0.12122100  |
| C | 12.41528800 | 1.73101700  | -0.26283000 |
| H | 10.27216700 | 1.70794200  | -0.33113100 |
| C | 13.60830000 | 1.06063200  | -0.09896900 |
| H | 12.42980900 | 2.80220400  | -0.42177800 |
| C | 14.90618800 | 1.76446400  | -0.15675800 |
| C | 15.11060600 | 2.78493700  | -1.09898700 |
| C | 15.94838500 | 1.46142600  | 0.73167800  |
| C | 16.30891100 | 3.47639100  | -1.14990800 |
| H | 14.32967100 | 3.02409100  | -1.80986200 |
| C | 17.14672600 | 2.15710600  | 0.68610000  |
| H | 15.81499400 | 0.68917800  | 1.47648700  |
| C | 17.34003900 | 3.17063300  | -0.25735800 |
| H | 16.45716100 | 4.25435500  | -1.88762700 |
| H | 17.93129600 | 1.91284800  | 1.38933500  |
| C | 18.60635600 | 3.93601900  | -0.34691100 |
| O | 18.81989200 | 4.82748100  | -1.14237500 |
| O | 19.53236900 | 3.54959700  | 0.55595600  |
| H | 20.32254100 | 4.10289200  | 0.42004300  |
| N | 12.30604600 | -2.32842100 | 0.36494500  |
| N | 14.52243000 | -1.20109300 | 0.26106200  |
| S | 13.89207500 | -2.68763700 | 0.45554500  |
| C | 7.92730700  | -2.58397200 | 0.31106300  |
| C | 5.43936900  | -2.97018200 | 0.29075700  |
| C | 6.17349400  | -4.11803400 | 0.53257700  |
| H | 5.70529700  | -5.07914800 | 0.69571100  |
| S | 6.50845800  | -1.59038500 | 0.07057700  |
| C | 7.55916300  | -3.89820800 | 0.54148100  |
| H | 8.29109700  | -4.67651100 | 0.71341800  |
| C | 9.27730300  | -2.09043500 | 0.27238100  |
| C | 9.64771600  | -0.80707900 | 0.06405100  |
| H | 10.03197600 | -2.85068200 | 0.42963900  |
| H | 8.87505900  | -0.05749200 | -0.08904400 |

#### D2P2A3

|   |            |             |            |
|---|------------|-------------|------------|
| C | 7.56037200 | -1.51104900 | 0.17325800 |
| C | 8.43198100 | -2.58628300 | 0.29374400 |

|   |              |             |             |
|---|--------------|-------------|-------------|
| S | 8.42953200   | 0.00094200  | 0.05530400  |
| C | 9.77169500   | -2.20019600 | 0.29110000  |
| H | 8.08582000   | -3.60653700 | 0.37919500  |
| C | 9.97247900   | -0.82832500 | 0.16975000  |
| H | 10.60102900  | -2.89045900 | 0.37489500  |
| C | 3.60352000   | -1.55370100 | 0.08175700  |
| C | 4.95027500   | -1.54230000 | 0.11281400  |
| C | 11.25948500  | -0.23528300 | 0.14559300  |
| H | 12.06386500  | -0.95736600 | 0.23080700  |
| C | 11.64653400  | 1.07225700  | 0.03526900  |
| C | 6.16879100   | -1.53472000 | 0.14161100  |
| C | 2.38377900   | -1.56775600 | 0.05532400  |
| C | 10.72294600  | 2.14616700  | -0.08136100 |
| N | 9.96433000   | 3.01157000  | -0.17567600 |
| C | 13.06593100  | 1.47730400  | 0.02711200  |
| O | 13.43728800  | 2.62879200  | -0.06774800 |
| O | 13.92077200  | 0.44257900  | 0.13454400  |
| H | 14.82531000  | 0.80421000  | 0.12219200  |
| C | -10.00391200 | 1.15597900  | 0.57359500  |
| C | -8.80374300  | 1.80217900  | 0.30547800  |
| C | -7.67346500  | 1.12101800  | -0.15926000 |
| C | -7.82373000  | -0.25866400 | -0.34797900 |
| C | -9.00545100  | -0.92438500 | -0.04944700 |
| C | -10.13731000 | -0.23693800 | 0.43008900  |
| C | -5.11837200  | -0.25779000 | -0.55396400 |
| C | -5.22611200  | 1.14074900  | -0.37831700 |
| C | -4.02223700  | 1.83617200  | -0.15936800 |
| H | -4.02626900  | 2.90704700  | -0.03024900 |
| C | -2.80482400  | 1.18090400  | -0.08776400 |
| C | -3.90483100  | -0.91175900 | -0.44038000 |
| H | -10.83350500 | 1.75763700  | 0.91529500  |
| H | -8.77243300  | 2.86992600  | 0.46025000  |
| H | -9.04070200  | -1.99204900 | -0.21298100 |
| N | -11.30859100 | -0.90542900 | 0.76337600  |
| H | -1.91968300  | 1.77810300  | 0.09887100  |
| H | -3.88279900  | -1.98507000 | -0.58292000 |
| C | -6.47531400  | 3.26168900  | -0.55043300 |
| C | -6.35106200  | 4.03631400  | 0.76496600  |
| H | -7.40405100  | 3.53184000  | -1.05316800 |
| H | -5.66925800  | 3.54907400  | -1.22601900 |
| H | -6.37671400  | 5.10734600  | 0.54669900  |
| H | -7.16701700  | 3.81507600  | 1.45365700  |
| H | -5.41488600  | 3.82250900  | 1.28180600  |
| N | -6.45428400  | 1.79266800  | -0.44805400 |
| S | -6.52037000  | -1.19954000 | -1.10778700 |
| C | -12.52997900 | -0.12705500 | 0.92264600  |
| C | -11.48741100 | -2.27498200 | 0.30037200  |
| H | -12.83206800 | 0.38082600  | -0.00449900 |
| H | -12.41529900 | 0.62611900  | 1.70355300  |
| H | -13.33352800 | -0.79578200 | 1.22620800  |
| H | -11.50826400 | -2.35253400 | -0.79624000 |

|   |              |             |             |
|---|--------------|-------------|-------------|
| H | -12.43022200 | -2.65505200 | 0.68977700  |
| H | -10.69233000 | -2.92209600 | 0.67430000  |
| C | -2.70917500  | -0.21116300 | -0.20707300 |
| C | -1.44156900  | -0.92016400 | -0.10065200 |
| C | -1.22577800  | -2.27581500 | 0.07251200  |
| S | 0.08611100   | -0.07688100 | -0.19034800 |
| C | 0.12789900   | -2.63904400 | 0.14194600  |
| H | -2.03087800  | -2.99130400 | 0.16688600  |
| C | 0.99462600   | -1.56738500 | 0.02213900  |
| H | 0.47862600   | -3.65229700 | 0.28462800  |

#### D2P4A3

|   |              |             |             |
|---|--------------|-------------|-------------|
| C | 10.55056400  | -1.37288500 | 0.16636100  |
| C | 11.45228200  | -2.42120500 | 0.29163100  |
| S | 11.37147000  | 0.16845400  | 0.09492300  |
| C | 12.77888100  | -1.99091300 | 0.33053100  |
| H | 11.13801100  | -3.45353000 | 0.35180000  |
| C | 12.93463800  | -0.61187700 | 0.23577000  |
| H | 13.62830800  | -2.65464000 | 0.42536000  |
| C | 1.47960500   | -1.57355600 | -0.21395800 |
| C | 2.81793500   | -1.56346200 | -0.16827400 |
| C | 14.20261700  | 0.02825000  | 0.25705200  |
| H | 15.03013700  | -0.66450100 | 0.36377600  |
| C | 14.53871200  | 1.34904500  | 0.16578900  |
| C | 4.04424500   | -1.54866600 | -0.12718000 |
| C | 5.37946300   | -1.52831400 | -0.07229200 |
| C | 6.60416700   | -1.50450000 | -0.02016600 |
| C | 7.94355000   | -1.46961500 | 0.04141400  |
| C | 9.16183200   | -1.43697400 | 0.09971500  |
| C | 0.25683400   | -1.58543000 | -0.24326500 |
| C | 13.57601700  | 2.38499900  | 0.01628100  |
| N | 12.78708100  | 3.21901500  | -0.10441300 |
| C | 15.94042200  | 1.81617600  | 0.21114200  |
| O | 16.26131000  | 2.98240900  | 0.12078700  |
| O | 16.83340100  | 0.82194700  | 0.36365600  |
| H | 17.72202400  | 1.22149600  | 0.38054400  |
| C | -12.04554200 | 1.35972900  | 0.75184000  |
| C | -10.85644700 | 1.95361400  | 0.34829900  |
| C | -9.76796300  | 1.20964700  | -0.11978200 |
| C | -9.94738200  | -0.17878300 | -0.16149100 |
| C | -11.11694600 | -0.78939100 | 0.27194500  |
| C | -12.20776000 | -0.03749100 | 0.74962100  |
| C | -7.26150500  | -0.24550300 | -0.55956600 |
| C | -7.34224900  | 1.16557400  | -0.51765100 |
| C | -6.11741200  | 1.85857900  | -0.46980000 |
| H | -6.10012600  | 2.93704500  | -0.45483800 |
| C | -4.90493700  | 1.19284100  | -0.43407000 |
| C | -6.04892100  | -0.90507900 | -0.47927300 |
| H | -12.84229800 | 2.00805200  | 1.08608100  |
| H | -10.80096100 | 3.03030400  | 0.39866700  |

|   |              |             |             |
|---|--------------|-------------|-------------|
| H | -11.17687400 | -1.86686300 | 0.21437800  |
| N | -13.36674100 | -0.64768100 | 1.21354400  |
| H | -4.00263000  | 1.79220700  | -0.39545100 |
| H | -6.05116100  | -1.98753200 | -0.50389800 |
| C | -8.57932600  | 3.27920600  | -0.81133300 |
| C | -8.35686800  | 4.18840800  | 0.40055200  |
| H | -9.53807900  | 3.51002600  | -1.27582300 |
| H | -7.82024500  | 3.47877700  | -1.56776500 |
| H | -8.37657500  | 5.22954500  | 0.06725700  |
| H | -9.13154700  | 4.06598200  | 1.15835400  |
| H | -7.39412700  | 4.01036700  | 0.88132500  |
| N | -8.56429500  | 1.82892800  | -0.55428400 |
| S | -8.70946700  | -1.21682600 | -0.90303100 |
| C | -14.56611900 | 0.16632200  | 1.36261400  |
| C | -13.59708100 | -2.04929600 | 0.88874200  |
| H | -14.91941500 | 0.57853300  | 0.40661400  |
| H | -14.39495900 | 0.99475300  | 2.05103200  |
| H | -15.35732300 | -0.45178300 | 1.78357000  |
| H | -13.70139000 | -2.22270100 | -0.19196400 |
| H | -14.51304800 | -2.37516700 | 1.37883500  |
| H | -12.78567900 | -2.67658100 | 1.26071900  |
| C | -4.83066100  | -0.20587600 | -0.41983500 |
| C | -3.56501700  | -0.92095200 | -0.35615700 |
| C | -3.35056100  | -2.28643600 | -0.26290800 |
| S | -2.03566600  | -0.07646100 | -0.39028900 |
| C | -1.99956400  | -2.65581600 | -0.21783100 |
| H | -4.15518900  | -3.00713100 | -0.22120300 |
| C | -1.12904400  | -1.58020400 | -0.27453200 |
| H | -1.65099500  | -3.67697700 | -0.14206700 |

D1P2A1@(TiO2)14

|   |             |             |             |
|---|-------------|-------------|-------------|
| C | 14.10960000 | -2.07050000 | 1.42560000  |
| C | 13.74290000 | -3.16410000 | 2.19760000  |
| S | 12.70130000 | -1.28800000 | 0.62120000  |
| C | 12.38250000 | -3.41510000 | 2.18270000  |
| H | 14.44400000 | -3.76800000 | 2.76000000  |
| C | 11.64770000 | -2.52960000 | 1.40230000  |
| H | 11.92530000 | -4.23270000 | 2.73240000  |
| C | 10.23810000 | -2.60460000 | 1.24660000  |
| H | 9.75650000  | -3.40460000 | 1.77720000  |
| C | 9.52040000  | -1.74170000 | 0.48750000  |
| H | 10.03820000 | -0.94740000 | -0.03310000 |
| C | 8.09770000  | -1.79540000 | 0.31080000  |
| C | 7.29320000  | -2.76190000 | 0.91740000  |
| C | 7.49310000  | -0.82370000 | -0.51720000 |
| C | 5.97680000  | -2.75810000 | 0.71010000  |
| H | 7.66270000  | -3.53620000 | 1.56160000  |
| C | 6.16190000  | -0.84810000 | -0.70580000 |
| H | 8.05030000  | -0.05800000 | -1.00810000 |
| H | 5.35890000  | -3.51470000 | 1.18590000  |

|    |             |             |             |
|----|-------------|-------------|-------------|
| H  | 5.66980000  | -0.11550000 | -1.33540000 |
| N  | 5.42060000  | -1.80280000 | -0.09670000 |
| C  | 3.98260000  | -1.86880000 | -0.26120000 |
| C  | 1.90340000  | -2.84430000 | 0.12730000  |
| C  | 2.12010000  | -0.94450000 | -1.35200000 |
| C  | 1.30780000  | -1.92080000 | -0.77690000 |
| H  | 1.31610000  | -3.59580000 | 0.64680000  |
| H  | 1.78260000  | -0.15570000 | -2.00370000 |
| N  | 3.36350000  | -1.07240000 | -1.00840000 |
| N  | 3.24810000  | -2.79750000 | 0.35210000  |
| C  | -0.10700000 | -1.96540000 | -1.01550000 |
| O  | -0.78850000 | -2.75260000 | -0.35440000 |
| O  | -0.54290000 | -1.16840000 | -1.87960000 |
| C  | 18.81660000 | -0.20520000 | 0.70300000  |
| C  | 17.70770000 | -0.67240000 | 0.89560000  |
| C  | 16.51420000 | -1.16300000 | 1.09330000  |
| C  | 15.40210000 | -1.60850000 | 1.26750000  |
| C  | 20.10560000 | 0.38370000  | 0.44560000  |
| C  | 22.05780000 | 1.73940000  | -0.29350000 |
| C  | 22.41520000 | 0.66430000  | 0.51000000  |
| H  | 23.42670000 | 0.44800000  | 0.81660000  |
| S  | 20.27780000 | 1.87160000  | -0.55250000 |
| C  | 21.33240000 | -0.08900000 | 0.91230000  |
| H  | 21.41420000 | -0.96780000 | 1.53500000  |
| C  | 24.30290000 | 2.76300000  | -0.77300000 |
| C  | 25.20490000 | 1.77990000  | -0.84930000 |
| C  | 26.45400000 | 2.38000000  | -0.91100000 |
| H  | 25.00380000 | 0.71030000  | -0.90480000 |
| C  | 26.26300000 | 3.70190000  | -0.89190000 |
| H  | 27.41420000 | 1.89150000  | -0.97840000 |
| H  | 27.01640000 | 4.47020000  | -0.93890000 |
| N  | 24.94380000 | 3.96650000  | -0.81480000 |
| H  | 24.49040000 | 4.89810000  | -0.80690000 |
| N  | 22.88400000 | 2.69340000  | -0.82280000 |
| H  | 22.41000000 | 3.50490000  | -1.26500000 |
| Ti | -5.33450000 | 2.16210000  | 3.73520000  |
| O  | -3.91900000 | 1.13710000  | 2.82170000  |
| O  | -7.27490000 | 2.09340000  | 3.47350000  |
| O  | -5.62460000 | 1.20830000  | 5.48230000  |
| O  | -6.25370000 | -0.84520000 | 1.39340000  |
| O  | -6.00770000 | 1.38860000  | -1.54740000 |
| O  | -4.77430000 | 0.19570000  | -0.01620000 |
| O  | -4.66530000 | -1.87090000 | 3.12960000  |
| O  | -6.98120000 | 4.21530000  | 0.47960000  |
| O  | -5.79360000 | 3.63680000  | 2.46760000  |
| Ti | -9.46140000 | 1.39050000  | 0.41880000  |
| O  | -9.47000000 | 2.97940000  | 1.65240000  |
| O  | -7.50180000 | 1.49270000  | 0.72470000  |
| O  | -7.58120000 | -1.34180000 | 4.11390000  |
| O  | -6.50760000 | -3.99090000 | 1.85530000  |
| Ti | -6.68880000 | 0.05920000  | -0.27490000 |

|    |             |             |             |
|----|-------------|-------------|-------------|
| Ti | -8.75410000 | -1.62490000 | -1.79900000 |
| O  | -8.60390000 | -0.14570000 | -0.50360000 |
| O  | -6.80440000 | -1.48140000 | -1.44040000 |
| Ti | -6.49650000 | -2.17240000 | 2.66250000  |
| Ti | -7.55030000 | 2.97700000  | 1.80880000  |
| Ti | -7.34290000 | 0.58980000  | 4.69240000  |
| O  | -3.67410000 | 3.14940000  | 0.16150000  |
| O  | -2.63990000 | -1.21820000 | 1.30370000  |
| Ti | -4.08560000 | 1.68820000  | -1.05170000 |
| O  | -2.35490000 | 0.97270000  | -1.48150000 |
| Ti | -4.33800000 | -0.44790000 | 1.78150000  |
| Ti | -5.07180000 | 4.39010000  | 0.77360000  |
| O  | -5.07640000 | 5.90200000  | -0.54680000 |
| O  | -4.08430000 | 2.51720000  | -2.84760000 |
| O  | -6.78100000 | 4.03990000  | -2.97470000 |
| O  | -5.85770000 | 0.96960000  | -4.72790000 |
| Ti | -5.93890000 | 2.23940000  | -3.20250000 |
| Ti | -6.76950000 | 5.09530000  | -1.22870000 |
| Ti | -2.62450000 | -2.64510000 | -0.00360000 |
| O  | -5.57280000 | -4.50850000 | -1.48800000 |
| O  | -3.24250000 | -4.33730000 | 0.73480000  |
| O  | -5.36990000 | -2.39460000 | -4.22760000 |
| O  | -3.45750000 | -2.16150000 | -1.65650000 |
| O  | -8.08560000 | -3.20320000 | -2.81050000 |
| Ti | -6.14280000 | -2.89860000 | -2.47840000 |
| Ti | -5.15360000 | -4.31320000 | 0.42790000  |
| Ti | -2.33680000 | -0.77600000 | -2.36100000 |
| O  | -2.71610000 | -0.52240000 | -4.27220000 |
| Ti | -4.67080000 | -0.58970000 | -4.43730000 |
| H  | -1.64280000 | 1.09750000  | -0.81690000 |

D1P4A1@(TiO2)14

|   |             |             |             |
|---|-------------|-------------|-------------|
| C | 14.23400000 | -1.48990000 | 1.16630000  |
| C | 13.04720000 | -1.98180000 | 1.29650000  |
| C | 10.62470000 | -2.87330000 | 1.50010000  |
| C | 10.22890000 | -3.98710000 | 2.21810000  |
| S | 9.25280000  | -2.02040000 | 0.68420000  |
| C | 8.86650000  | -4.21430000 | 2.16450000  |
| H | 10.90480000 | -4.62550000 | 2.77390000  |
| C | 8.16370000  | -3.28400000 | 1.40270000  |
| H | 8.39380000  | -5.04370000 | 2.67450000  |
| C | 6.76330000  | -3.33570000 | 1.23400000  |
| H | 6.25510000  | -4.13760000 | 1.73690000  |
| C | 6.06940000  | -2.44200000 | 0.48950000  |
| H | 6.61530000  | -1.65470000 | -0.01100000 |
| C | 4.65220000  | -2.45130000 | 0.30920000  |
| C | 3.80950000  | -3.40340000 | 0.90500000  |
| C | 4.07410000  | -1.45420000 | -0.49950000 |
| C | 2.48600000  | -3.34720000 | 0.70480000  |
| H | 4.15620000  | -4.19970000 | 1.53250000  |

|    |              |             |             |
|----|--------------|-------------|-------------|
| C  | 2.74170000   | -1.43120000 | -0.67790000 |
| H  | 4.66330000   | -0.69490000 | -0.98800000 |
| H  | 1.85940000   | -4.09270000 | 1.17370000  |
| H  | 2.31850000   | -0.64800000 | -1.30620000 |
| N  | 1.97000000   | -2.36190000 | -0.07790000 |
| C  | 0.51720000   | -2.33580000 | -0.26920000 |
| C  | -1.63540000  | -3.20160000 | 0.20190000  |
| C  | -1.35030000  | -1.42010000 | -1.37090000 |
| C  | -2.18130000  | -2.32860000 | -0.74480000 |
| H  | -2.23800000  | -3.88300000 | 0.77070000  |
| H  | -1.73160000  | -0.66990000 | -2.06090000 |
| N  | -0.00440000  | -1.44290000 | -1.14080000 |
| N  | -0.27680000  | -3.18090000 | 0.39800000  |
| C  | -3.63410000  | -2.29470000 | -0.98190000 |
| O  | -4.36800000  | -2.92140000 | -0.30000000 |
| O  | -4.00610000  | -1.44670000 | -1.89030000 |
| C  | 11.92590000  | -2.42590000 | 1.41000000  |
| C  | 15.34810000  | -1.02380000 | 1.04470000  |
| C  | 21.51710000  | 1.54280000  | 0.39950000  |
| C  | 23.43410000  | 2.89150000  | -0.28850000 |
| C  | 23.75460000  | 1.89380000  | 0.61070000  |
| H  | 24.74290000  | 1.71660000  | 1.01990000  |
| S  | 21.67910000  | 2.96370000  | -0.68500000 |
| C  | 22.64670000  | 1.14210000  | 0.97110000  |
| H  | 22.70390000  | 0.30680000  | 1.65500000  |
| C  | 25.69830000  | 3.94520000  | -0.63630000 |
| C  | 26.59670000  | 2.98570000  | -0.60950000 |
| C  | 27.84120000  | 3.60290000  | -0.59440000 |
| H  | 26.42400000  | 1.90740000  | -0.64690000 |
| C  | 27.61370000  | 4.90410000  | -0.63720000 |
| H  | 28.80690000  | 3.12900000  | -0.56720000 |
| H  | 28.38080000  | 5.67900000  | -0.64810000 |
| N  | 26.31160000  | 5.16280000  | -0.67350000 |
| H  | 25.83460000  | 6.08720000  | -0.73900000 |
| N  | 24.28540000  | 3.83070000  | -0.81620000 |
| H  | 23.82320000  | 4.60360000  | -1.34610000 |
| H  | -4.95660000  | 0.98510000  | -0.77870000 |
| C  | 16.66040000  | -0.49000000 | 0.91620000  |
| C  | 17.79300000  | -0.05130000 | 0.82240000  |
| C  | 19.11300000  | 0.46190000  | 0.71230000  |
| C  | 20.22410000  | 0.92580000  | 0.59620000  |
| Ti | -8.60170000  | 2.39800000  | 3.69680000  |
| O  | -7.26390000  | 1.24380000  | 2.79880000  |
| O  | -10.52360000 | 2.53770000  | 3.38120000  |
| O  | -9.03890000  | 1.42220000  | 5.42790000  |
| O  | -9.79700000  | -0.43590000 | 1.27240000  |
| O  | -9.20630000  | 1.79420000  | -1.59420000 |
| O  | -8.19550000  | 0.40700000  | -0.09570000 |
| O  | -8.39190000  | -1.70330000 | 3.02310000  |
| O  | -9.90480000  | 4.66090000  | 0.46370000  |
| O  | -8.89740000  | 3.96760000  | 2.49210000  |

|    |              |             |             |
|----|--------------|-------------|-------------|
| Ti | -12.71590000 | 2.17330000  | 0.26410000  |
| O  | -12.58300000 | 3.73430000  | 1.54200000  |
| O  | -10.76890000 | 2.02040000  | 0.60710000  |
| O  | -11.31910000 | -0.85920000 | 3.95740000  |
| O  | -10.48800000 | -3.57950000 | 1.65610000  |
| Ti | -10.08630000 | 0.52720000  | -0.38920000 |
| Ti | -12.31840000 | -0.87810000 | -1.96910000 |
| O  | -12.00340000 | 0.58350000  | -0.68200000 |
| O  | -10.37210000 | -0.96390000 | -1.58420000 |
| Ti | -10.26050000 | -1.76450000 | 2.49860000  |
| Ti | -10.65420000 | 3.47510000  | 1.73650000  |
| Ti | -10.83020000 | 1.04390000  | 4.59070000  |
| O  | -6.71020000  | 3.24450000  | 0.23850000  |
| O  | -6.20520000  | -1.22810000 | 1.29000000  |
| Ti | -7.30840000  | 1.86680000  | -1.05200000 |
| O  | -5.65160000  | 0.94500000  | -1.48340000 |
| Ti | -7.88770000  | -0.28570000 | 1.70870000  |
| Ti | -8.00060000  | 4.61870000  | 0.82970000  |
| O  | -7.78450000  | 6.15800000  | -0.47570000 |
| O  | -7.13210000  | 2.72040000  | -2.83910000 |
| O  | -9.68120000  | 4.58510000  | -3.02190000 |
| O  | -9.07210000  | 1.45240000  | -4.82680000 |
| Ti | -9.02480000  | 2.67780000  | -3.23850000 |
| Ti | -9.57610000  | 5.58720000  | -1.21200000 |
| Ti | -6.25370000  | -2.66020000 | -0.07020000 |
| O  | -9.47430000  | -4.14810000 | -1.69910000 |
| O  | -7.17890000  | -4.26450000 | 0.62630000  |
| O  | -8.97950000  | -2.00210000 | -4.40710000 |
| O  | -7.09290000  | -2.08550000 | -1.71660000 |
| O  | -11.82720000 | -2.48940000 | -3.03590000 |
| Ti | -9.84650000  | -2.42880000 | -2.65420000 |
| Ti | -9.09750000  | -3.98600000 | 0.24910000  |
| Ti | -5.75890000  | -0.80370000 | -2.33190000 |
| O  | -6.08170000  | -0.43450000 | -4.26900000 |
| Ti | -8.05170000  | -0.25680000 | -4.50640000 |

D1P2A2@(TiO2)14

|   |             |             |             |
|---|-------------|-------------|-------------|
| C | 20.46030000 | 0.20640000  | 0.70370000  |
| C | 22.65720000 | 1.42170000  | 0.43730000  |
| C | 22.77380000 | 0.21260000  | 1.09930000  |
| H | 23.70850000 | -0.16810000 | 1.48070000  |
| S | 20.99770000 | 1.72490000  | -0.03900000 |
| C | 21.54390000 | -0.45320000 | 1.24730000  |
| H | 21.43760000 | -1.40450000 | 1.75220000  |
| C | 24.99060000 | 2.18940000  | 0.25310000  |
| C | 25.81610000 | 1.08170000  | 0.22470000  |
| C | 27.15090000 | 1.56140000  | 0.37480000  |
| H | 25.50820000 | 0.05840000  | 0.09030000  |
| C | 27.09730000 | 2.92970000  | 0.48170000  |
| H | 28.04680000 | 0.96010000  | 0.39400000  |



|    |             |             |             |
|----|-------------|-------------|-------------|
| H  | 27.87330000 | 3.66820000  | 0.59790000  |
| N  | 25.77480000 | 3.30140000  | 0.41520000  |
| H  | 25.42900000 | 4.24820000  | 0.48630000  |
| N  | 23.61070000 | 2.34590000  | 0.12540000  |
| H  | 23.29930000 | 3.22930000  | -0.25680000 |
| C  | 19.12160000 | -0.16140000 | 0.68730000  |
| C  | 17.94060000 | -0.47150000 | 0.66510000  |
| C  | 16.63670000 | -0.82040000 | 0.64400000  |
| C  | 15.46060000 | -1.14220000 | 0.62800000  |
| C  | 7.81580000  | -1.76550000 | -0.22550000 |
| C  | 6.79590000  | -2.73390000 | 0.06370000  |
| C  | 7.36960000  | -0.60700000 | -0.83590000 |
| C  | 5.40830000  | -2.50600000 | -0.28500000 |
| C  | 6.01600000  | -0.38300000 | -1.16820000 |
| H  | 8.07570000  | 0.17420000  | -1.08760000 |
| C  | 5.00470000  | -1.29250000 | -0.92690000 |
| H  | 5.77290000  | 0.54930000  | -1.66310000 |
| C  | 3.60590000  | -1.01410000 | -1.31110000 |
| C  | 3.07780000  | 0.27940000  | -1.16800000 |
| C  | 2.77980000  | -2.01120000 | -1.85170000 |
| C  | 1.77880000  | 0.56500000  | -1.55230000 |
| H  | 3.68580000  | 1.06310000  | -0.73330000 |
| C  | 1.48090000  | -1.72550000 | -2.24250000 |
| H  | 3.16200000  | -3.01360000 | -1.98540000 |
| C  | 0.96570000  | -0.43420000 | -2.09490000 |
| H  | 1.38200000  | 1.56420000  | -1.42770000 |
| H  | 0.86840000  | -2.50890000 | -2.66810000 |
| C  | -0.41820000 | -0.08630000 | -2.49440000 |
| O  | -0.94970000 | 1.10560000  | -2.38520000 |
| O  | -1.08480000 | -1.09400000 | -2.97900000 |
| N  | 6.99680000  | -3.90550000 | 0.67510000  |
| N  | 4.60780000  | -3.51330000 | 0.08650000  |
| S  | 5.54740000  | -4.63630000 | 0.79650000  |
| C  | 11.61480000 | -1.58570000 | 0.27230000  |
| C  | 14.11400000 | -1.50330000 | 0.60500000  |
| C  | 13.52390000 | -2.66270000 | 1.08390000  |
| H  | 14.09870000 | -3.44920000 | 1.55390000  |
| S  | 12.89690000 | -0.45190000 | -0.08980000 |
| C  | 12.13450000 | -2.70550000 | 0.89780000  |
| H  | 11.52100000 | -3.53860000 | 1.21320000  |
| C  | 10.26010000 | -1.26000000 | -0.09190000 |
| C  | 9.19220000  | -2.05850000 | 0.12930000  |
| H  | 10.11930000 | -0.30020000 | -0.57860000 |
| H  | 9.34890000  | -3.01570000 | 0.61320000  |
| Ti | -5.94770000 | -2.23160000 | 3.43990000  |
| O  | -4.64890000 | -1.99210000 | 2.08750000  |
| O  | -7.93680000 | -1.95260000 | 3.30900000  |
| O  | -6.39680000 | -4.06460000 | 3.54740000  |
| O  | -6.62390000 | -1.46270000 | -0.35730000 |
| O  | -6.28770000 | 2.23070000  | 0.23250000  |
| O  | -4.98210000 | 0.19190000  | 0.23880000  |

|    |             |             |             |
|----|-------------|-------------|-------------|
| O  | -5.16190000 | -3.49370000 | -0.25460000 |
| O  | -7.54420000 | 1.79200000  | 3.83270000  |
| O  | -6.16210000 | -0.30410000 | 3.97700000  |
| Ti | -9.78030000 | 0.49870000  | 1.08460000  |
| O  | -9.84190000 | 0.21700000  | 3.00340000  |
| O  | -7.86820000 | 0.23330000  | 1.50080000  |
| O  | -7.80070000 | -3.87540000 | 0.60580000  |
| O  | -6.47260000 | -3.15150000 | -2.69720000 |
| Ti | -6.98460000 | 0.45780000  | -0.23680000 |
| Ti | -8.88030000 | 1.01720000  | -2.59070000 |
| O  | -8.91970000 | 0.66110000  | -0.67230000 |
| O  | -6.95890000 | 0.72390000  | -2.16170000 |
| Ti | -6.79510000 | -3.23990000 | -0.85850000 |
| Ti | -8.06340000 | -0.01390000 | 3.31800000  |
| Ti | -7.83180000 | -3.65770000 | 2.44620000  |
| O  | -4.39100000 | 1.62450000  | 2.60450000  |
| O  | -3.09320000 | -1.70460000 | -0.58310000 |
| Ti | -4.32500000 | 1.83270000  | 0.85460000  |
| O  | -2.49480000 | 1.67180000  | 0.23360000  |
| Ti | -4.68890000 | -1.70570000 | 0.32760000  |
| Ti | -5.58480000 | 1.60410000  | 4.07570000  |
| O  | -5.66690000 | 3.31230000  | 4.87920000  |
| O  | -4.37770000 | 3.76490000  | 0.82260000  |
| O  | -6.85940000 | 4.40100000  | 2.00800000  |
| O  | -5.76190000 | 4.53860000  | -1.44470000 |
| Ti | -6.05310000 | 4.05890000  | 0.35190000  |
| Ti | -7.06810000 | 3.64560000  | 3.69540000  |
| Ti | -2.80550000 | -1.33550000 | -2.34060000 |
| O  | -5.65530000 | -0.63600000 | -4.46980000 |
| O  | -3.32780000 | -2.55540000 | -3.59980000 |
| O  | -5.39400000 | 2.56840000  | -3.81680000 |
| O  | -3.07100000 | 0.50040000  | -2.60130000 |
| O  | -8.02680000 | 1.21070000  | -4.35050000 |
| Ti | -6.31670000 | 0.96420000  | -3.89100000 |
| Ti | -5.17330000 | -2.26030000 | -3.70840000 |
| Ti | -2.35370000 | 1.90920000  | -1.76540000 |
| O  | -2.79470000 | 3.44410000  | -2.62150000 |
| Ti | -4.62850000 | 3.78200000  | -2.69880000 |
| H  | -1.74400000 | 1.30160000  | 0.73480000  |

D1P4A2@(TiO2)14

|   |              |             |             |
|---|--------------|-------------|-------------|
| C | -24.54500000 | -0.56430000 | 0.47060000  |
| C | -26.83160000 | -1.61500000 | 0.27800000  |
| C | -26.86420000 | -0.29490000 | 0.70260000  |
| H | -27.77720000 | 0.22810000  | 0.94110000  |
| S | -25.18790000 | -2.14630000 | -0.01580000 |
| C | -25.58990000 | 0.27720000  | 0.81140000  |
| H | -25.41740000 | 1.29350000  | 1.14020000  |
| C | -29.21930000 | -2.17770000 | 0.10010000  |
| C | -29.92630000 | -1.03200000 | -0.20920000 |

|   |              |             |             |
|---|--------------|-------------|-------------|
| C | -31.30530000 | -1.33830000 | -0.02030000 |
| H | -29.51090000 | -0.09750000 | -0.54800000 |
| C | -31.39380000 | -2.64850000 | 0.38510000  |
| H | -32.13580000 | -0.66680000 | -0.17530000 |
| H | -32.24390000 | -3.26620000 | 0.62320000  |
| N | -30.11610000 | -3.14760000 | 0.46400000  |
| H | -29.86960000 | -4.08320000 | 0.75590000  |
| N | -27.85730000 | -2.48530000 | 0.07490000  |
| H | -27.62520000 | -3.44440000 | -0.15030000 |
| C | -21.98090000 | -0.09090000 | 0.46510000  |
| C | -20.66680000 | 0.16630000  | 0.45960000  |
| C | -19.46340000 | 0.41210000  | 0.45090000  |
| C | -18.15610000 | 0.69380000  | 0.44320000  |
| C | -16.95960000 | 0.96570000  | 0.43330000  |
| C | -15.65350000 | 1.27470000  | 0.42510000  |
| C | -14.46920000 | 1.57450000  | 0.41600000  |
| C | -23.18650000 | -0.31080000 | 0.47040000  |
| C | -6.79560000  | 2.08220000  | -0.15470000 |
| C | -5.79070000  | 3.08470000  | 0.05900000  |
| C | -6.32250000  | 0.85670000  | -0.58770000 |
| C | -4.38800000  | 2.81880000  | -0.18440000 |
| C | -4.95390000  | 0.59670000  | -0.81680000 |
| H | -7.01760000  | 0.04840000  | -0.77630000 |
| C | -3.95480000  | 1.53400000  | -0.64150000 |
| H | -4.68770000  | -0.39050000 | -1.17430000 |
| C | -2.53820000  | 1.21470000  | -0.91280000 |
| C | -2.02080000  | -0.04520000 | -0.57180000 |
| C | -1.68440000  | 2.13590000  | -1.53780000 |
| C | -0.70370000  | -0.37200000 | -0.84640000 |
| H | -2.65200000  | -0.76760000 | -0.06930000 |
| C | -0.36730000  | 1.80810000  | -1.81930000 |
| H | -2.05800000  | 3.10940000  | -1.82350000 |
| C | 0.13770000   | 0.55080000  | -1.47420000 |
| H | -0.31520000  | -1.34360000 | -0.56970000 |
| H | 0.26760000   | 2.53110000  | -2.31310000 |
| C | 1.54020000   | 0.16070000  | -1.75160000 |
| O | 2.06290000   | -1.00200000 | -1.45720000 |
| O | 2.23250000   | 1.09880000  | -2.33270000 |
| N | -6.02030000  | 4.32530000  | 0.50070000  |
| N | -3.60510000  | 3.86940000  | 0.09290000  |
| S | -4.57720000  | 5.07130000  | 0.59990000  |
| C | -10.61310000 | 1.95370000  | 0.18430000  |
| C | -13.12240000 | 1.92090000  | 0.40410000  |
| C | -12.54890000 | 3.14170000  | 0.72920000  |
| H | -13.14170000 | 3.98910000  | 1.04560000  |
| S | -11.87950000 | 0.77640000  | -0.06270000 |
| C | -11.15410000 | 3.15730000  | 0.60620000  |
| H | -10.55070000 | 4.02880000  | 0.82090000  |
| C | -9.24300000  | 1.58090000  | -0.06020000 |
| C | -8.18810000  | 2.41280000  | 0.08630000  |
| H | -9.07960000  | 0.55820000  | -0.38440000 |

|    |             |             |             |
|----|-------------|-------------|-------------|
| H  | -8.36910000 | 3.43100000  | 0.41130000  |
| Ti | 7.21200000  | 2.39700000  | 3.18240000  |
| O  | 5.87260000  | 2.10180000  | 1.88160000  |
| O  | 9.18520000  | 2.02880000  | 3.03290000  |
| O  | 7.73340000  | 4.21320000  | 3.13110000  |
| O  | 7.76630000  | 1.29870000  | -0.55300000 |
| O  | 7.30320000  | -2.31880000 | 0.34210000  |
| O  | 6.07720000  | -0.23540000 | 0.21000000  |
| O  | 6.38600000  | 3.38830000  | -0.58520000 |
| O  | 8.66220000  | -1.64270000 | 3.86750000  |
| O  | 7.36530000  | 0.51190000  | 3.86990000  |
| Ti | 10.87920000 | -0.66550000 | 0.97690000  |
| O  | 10.99780000 | -0.23310000 | 2.86470000  |
| O  | 8.98930000  | -0.29100000 | 1.41020000  |
| O  | 9.05750000  | 3.73190000  | 0.18580000  |
| O  | 7.62330000  | 2.79850000  | -3.01880000 |
| Ti | 8.05590000  | -0.61880000 | -0.28440000 |
| Ti | 9.87140000  | -1.44130000 | -2.62420000 |
| O  | 9.97070000  | -0.93400000 | -0.74240000 |
| O  | 7.97360000  | -1.03750000 | -2.18030000 |
| Ti | 7.99320000  | 3.02150000  | -1.20060000 |
| Ti | 9.23770000  | 0.09360000  | 3.19690000  |
| Ti | 9.12470000  | 3.66170000  | 2.03670000  |
| O  | 5.48900000  | -1.44820000 | 2.69620000  |
| O  | 4.24300000  | 1.66310000  | -0.72360000 |
| Ti | 5.37290000  | -1.79360000 | 0.97070000  |
| O  | 3.53560000  | -1.61000000 | 0.37730000  |
| Ti | 5.85900000  | 1.67330000  | 0.15030000  |
| Ti | 6.71790000  | -1.35750000 | 4.13540000  |
| O  | 6.75390000  | -2.99750000 | 5.07320000  |
| O  | 5.35070000  | -3.72270000 | 1.09480000  |
| O  | 7.83410000  | -4.36050000 | 2.27570000  |
| O  | 6.64910000  | -4.73110000 | -1.13050000 |
| Ti | 7.00180000  | -4.12060000 | 0.61460000  |
| Ti | 8.11220000  | -3.48090000 | 3.89140000  |
| Ti | 3.89900000  | 1.16580000  | -2.43890000 |
| O  | 6.66770000  | 0.18340000  | -4.56350000 |
| O  | 4.43710000  | 2.25840000  | -3.80380000 |
| O  | 6.29970000  | -2.94510000 | -3.64670000 |
| O  | 4.08760000  | -0.69430000 | -2.55490000 |
| O  | 8.96890000  | -1.74130000 | -4.34410000 |
| Ti | 7.28100000  | -1.39020000 | -3.87050000 |
| Ti | 6.26670000  | 1.88170000  | -3.92670000 |
| Ti | 3.33730000  | -2.00150000 | -1.59240000 |
| O  | 3.69840000  | -3.61670000 | -2.32990000 |
| Ti | 5.51550000  | -4.03300000 | -2.41790000 |
| H  | 2.81190000  | -1.17080000 | 0.86240000  |

D1P2A3@(TiO2)14

|    |             |            |             |
|----|-------------|------------|-------------|
| Ti | -5.12380000 | 2.52780000 | -2.87310000 |
|----|-------------|------------|-------------|

|    |             |             |             |
|----|-------------|-------------|-------------|
| O  | -3.36830000 | 2.24670000  | -2.49170000 |
| O  | -6.83250000 | 2.44260000  | -1.74480000 |
| O  | -5.48500000 | 4.31500000  | -2.85020000 |
| O  | -3.89810000 | 1.80250000  | 0.62700000  |
| O  | -4.15110000 | -1.81470000 | -0.03930000 |
| O  | -3.08190000 | 0.12230000  | -0.76140000 |
| O  | -2.62750000 | 3.72620000  | -0.21650000 |
| O  | -7.08040000 | -1.18190000 | -2.40610000 |
| O  | -5.82710000 | 0.78800000  | -3.35240000 |
| Ti | -7.36100000 | 0.09470000  | 1.03680000  |
| O  | -8.44280000 | 0.44780000  | -0.51030000 |
| O  | -5.98870000 | 0.24250000  | -0.31960000 |
| O  | -5.30400000 | 4.31530000  | 0.50650000  |
| O  | -2.78300000 | 3.50990000  | 2.64190000  |
| Ti | -4.33630000 | -0.05600000 | 0.67390000  |
| Ti | -4.67360000 | -0.58330000 | 3.59920000  |
| O  | -5.83610000 | -0.20510000 | 2.11300000  |
| O  | -3.35300000 | -0.40910000 | 2.20310000  |
| Ti | -3.74290000 | 3.56880000  | 1.12830000  |
| Ti | -7.14320000 | 0.57220000  | -1.68980000 |
| Ti | -6.07550000 | 4.03280000  | -1.13730000 |
| O  | -3.60580000 | -1.19540000 | -3.12530000 |
| O  | -0.82550000 | 1.68500000  | -0.56750000 |
| Ti | -2.81550000 | -1.60730000 | -1.55890000 |
| O  | -1.05740000 | -1.70730000 | -1.19040000 |
| Ti | -2.57080000 | 1.97080000  | -0.89960000 |
| Ti | -5.37330000 | -1.08660000 | -3.53700000 |
| O  | -5.97010000 | -2.69870000 | -4.14190000 |
| O  | -3.12640000 | -3.46430000 | -1.53980000 |
| O  | -5.86990000 | -3.91520000 | -1.00710000 |
| O  | -3.31710000 | -4.25340000 | 1.21520000  |
| Ti | -4.24010000 | -3.64810000 | -0.19750000 |
| Ti | -6.55680000 | -2.97070000 | -2.42490000 |
| Ti | -0.03420000 | 1.25120000  | 1.00430000  |
| O  | -1.15370000 | 0.87570000  | 3.89100000  |
| O  | 0.28840000  | 2.65790000  | 2.11760000  |
| O  | -1.36740000 | -2.48470000 | 3.26160000  |
| O  | -0.61410000 | -0.46830000 | 1.46410000  |
| O  | -3.13860000 | -0.87920000 | 4.59090000  |
| Ti | -1.85070000 | -0.72650000 | 3.35490000  |
| Ti | -1.24860000 | 2.48100000  | 3.04100000  |
| Ti | -0.23530000 | -1.98030000 | 0.40180000  |
| Ti | -1.66170000 | -3.66520000 | 1.91130000  |
| C  | 13.44460000 | -0.57000000 | -0.28760000 |
| C  | 12.28880000 | -0.23070000 | -0.13780000 |
| C  | 10.99050000 | 0.10350000  | 0.03600000  |
| C  | 9.82600000  | 0.40710000  | 0.18050000  |
| C  | 8.48820000  | 0.75970000  | 0.36090000  |
| C  | 7.97580000  | 2.00050000  | 0.63540000  |
| S  | 7.18900000  | -0.47470000 | 0.23510000  |
| C  | 6.56930000  | 2.01760000  | 0.75970000  |

|   |             |             |             |
|---|-------------|-------------|-------------|
| H | 8.60210000  | 2.87190000  | 0.74710000  |
| C | 5.96440000  | 0.79830000  | 0.58310000  |
| H | 5.99890000  | 2.90980000  | 0.97900000  |
| C | 4.55890000  | 0.57740000  | 0.66130000  |
| H | 3.96050000  | 1.45570000  | 0.89010000  |
| C | 3.85760000  | -0.56310000 | 0.49650000  |
| C | 4.41890000  | -1.82990000 | 0.20200000  |
| C | 2.38930000  | -0.50770000 | 0.64450000  |
| O | 1.85360000  | 0.63390000  | 0.90680000  |
| O | 1.71920000  | -1.58900000 | 0.50170000  |
| N | 4.88360000  | -2.86480000 | -0.03490000 |
| C | 14.77150000 | -0.94020000 | -0.47740000 |
| C | 15.27960000 | -2.19370000 | -0.64850000 |
| S | 16.09920000 | 0.30150000  | -0.56680000 |
| C | 16.67990000 | -2.24540000 | -0.86360000 |
| H | 14.64940000 | -3.07040000 | -0.62960000 |
| C | 17.28750000 | -1.01950000 | -0.84960000 |
| H | 17.22450000 | -3.16350000 | -1.02730000 |
| H | 19.22610000 | -1.59400000 | -0.96990000 |
| C | 19.23660000 | 0.46190000  | -1.14800000 |
| C | 18.78380000 | 1.67980000  | -1.57700000 |
| C | 19.89970000 | 2.56530000  | -1.51040000 |
| H | 17.79740000 | 1.92220000  | -1.93080000 |
| C | 20.94560000 | 1.82790000  | -1.05220000 |
| H | 19.89890000 | 3.60780000  | -1.78390000 |
| H | 21.97320000 | 2.07840000  | -0.86350000 |
| N | 18.62790000 | -0.77460000 | -0.97740000 |
| H | 21.10490000 | -0.17230000 | -0.46450000 |
| N | 20.52460000 | 0.56530000  | -0.82700000 |
| H | 0.83670000  | -3.66070000 | 1.11810000  |
| O | -0.14610000 | -3.71350000 | 0.94080000  |

D1P4A3@(TiO2)14

|    |             |             |             |
|----|-------------|-------------|-------------|
| Ti | -6.20080000 | 1.97810000  | -3.18280000 |
| O  | -4.42700000 | 1.74660000  | -2.81980000 |
| O  | -7.93330000 | 2.08130000  | -2.07690000 |
| O  | -6.53480000 | 3.74830000  | -3.45470000 |
| O  | -4.99630000 | 1.89080000  | 0.36890000  |
| O  | -5.18060000 | -1.84790000 | 0.31260000  |
| O  | -4.10400000 | -0.01100000 | -0.70380000 |
| O  | -3.72620000 | 3.66880000  | -0.82620000 |
| O  | -8.11450000 | -1.68380000 | -2.13330000 |
| O  | -6.92680000 | 0.16610000  | -3.41020000 |
| Ti | -8.39270000 | 0.17270000  | 1.00920000  |
| O  | -9.51160000 | 0.24800000  | -0.58740000 |
| O  | -7.01390000 | 0.12520000  | -0.36740000 |
| O  | -6.41330000 | 4.36910000  | -0.13480000 |
| O  | -3.86870000 | 3.94310000  | 2.04270000  |
| Ti | -5.35680000 | 0.02750000  | 0.71100000  |
| Ti | -5.65560000 | 0.00780000  | 3.67970000  |

|    |             |             |             |
|----|-------------|-------------|-------------|
| O  | -6.87010000 | 0.09360000  | 2.16380000  |
| O  | -4.32530000 | -0.04560000 | 2.23410000  |
| Ti | -4.82540000 | 3.71110000  | 0.54320000  |
| Ti | -8.18940000 | 0.20030000  | -1.73920000 |
| Ti | -7.14340000 | 3.73370000  | -1.71760000 |
| O  | -4.58890000 | -1.66530000 | -2.86510000 |
| O  | -1.89460000 | 1.59460000  | -0.97570000 |
| Ti | -3.83930000 | -1.85740000 | -1.24190000 |
| O  | -2.05220000 | -1.81440000 | -1.02580000 |
| Ti | -3.66800000 | 1.81680000  | -1.19150000 |
| Ti | -6.37500000 | -1.71420000 | -3.23560000 |
| O  | -6.87760000 | -3.43260000 | -3.56530000 |
| O  | -4.07900000 | -3.70250000 | -0.93220000 |
| O  | -6.82570000 | -4.16280000 | -0.26560000 |
| O  | -4.26170000 | -4.04570000 | 1.92680000  |
| Ti | -5.18390000 | -3.68150000 | 0.43330000  |
| Ti | -7.48800000 | -3.41620000 | -1.82860000 |
| Ti | -1.09420000 | 1.43990000  | 0.64570000  |
| O  | -2.09870000 | 1.52210000  | 3.64820000  |
| O  | -0.77270000 | 3.00200000  | 1.51800000  |
| O  | -2.26960000 | -1.86060000 | 3.60310000  |
| O  | -1.60810000 | -0.17110000 | 1.41360000  |
| O  | -4.08690000 | -0.08650000 | 4.73110000  |
| Ti | -2.84610000 | -0.13560000 | 3.45720000  |
| Ti | -2.29620000 | 2.93910000  | 2.49550000  |
| Ti | -1.22620000 | -1.80100000 | 0.58860000  |
| Ti | -2.59740000 | -3.21700000 | 2.40480000  |
| C  | 17.57310000 | -1.18300000 | -0.63890000 |
| C  | 16.37210000 | -0.96440000 | -0.54030000 |
| C  | 15.04100000 | -0.72750000 | -0.43570000 |
| C  | 13.84080000 | -0.49940000 | -0.34260000 |
| C  | 12.51610000 | -0.22610000 | -0.23900000 |
| C  | 11.32500000 | 0.03600000  | -0.14520000 |
| C  | 10.00390000 | 0.34920000  | -0.04040000 |
| C  | 8.82730000  | 0.65190000  | 0.05480000  |
| C  | 7.47100000  | 1.01200000  | 0.16570000  |
| C  | 6.96070000  | 2.29160000  | 0.29640000  |
| S  | 6.21650000  | -0.18570000 | 0.15160000  |
| C  | 5.55910000  | 2.29930000  | 0.38420000  |
| H  | 7.59200000  | 3.17000000  | 0.32570000  |
| C  | 4.99250000  | 1.03700000  | 0.32230000  |
| H  | 4.95650000  | 3.19440000  | 0.49210000  |
| C  | 3.57550000  | 0.82060000  | 0.39620000  |
| H  | 2.98070000  | 1.72630000  | 0.49870000  |
| C  | 2.86250000  | -0.33190000 | 0.36450000  |
| C  | 3.47230000  | -1.62150000 | 0.24130000  |
| C  | 1.37870000  | -0.27780000 | 0.47680000  |
| O  | 0.84950000  | 0.87020000  | 0.54400000  |
| O  | 0.76100000  | -1.37750000 | 0.49820000  |
| N  | 4.00390000  | -2.64510000 | 0.13600000  |
| C  | 18.94540000 | -1.39430000 | -0.74480000 |

|   |             |             |             |
|---|-------------|-------------|-------------|
| C | 19.62310000 | -2.57150000 | -1.01570000 |
| S | 20.07890000 | -0.06410000 | -0.55580000 |
| C | 21.01460000 | -2.43160000 | -1.08410000 |
| H | 19.10140000 | -3.51010000 | -1.16070000 |
| C | 21.42710000 | -1.12450000 | -0.85210000 |
| H | 21.72770000 | -3.22690000 | -1.26990000 |
| C | 23.22020000 | 0.53530000  | -0.59150000 |
| C | 22.68280000 | 1.77200000  | -0.78030000 |
| C | 23.59550000 | 2.79490000  | -0.37680000 |
| H | 21.71690000 | 1.95520000  | -1.22930000 |
| C | 24.76130000 | 2.29200000  | 0.07980000  |
| H | 23.38480000 | 3.85480000  | -0.44990000 |
| H | 25.64620000 | 2.80680000  | 0.42380000  |
| H | 23.41840000 | -1.49050000 | -0.89480000 |
| N | 22.72540000 | -0.72710000 | -0.82010000 |
| N | 24.73780000 | 0.65670000  | 0.03810000  |
| H | 25.36730000 | 0.01510000  | 0.28380000  |
| H | -0.12900000 | -3.32450000 | 1.70670000  |
| O | -1.08440000 | -3.39870000 | 1.42080000  |

D2P2A1@(TiO2)14

|   |              |             |             |
|---|--------------|-------------|-------------|
| C | -27.19400000 | 3.29100000  | 0.24650000  |
| C | -25.83290000 | 3.53720000  | 0.37730000  |
| C | -24.86170000 | 2.68630000  | -0.16190000 |
| C | -25.34340000 | 1.56190000  | -0.84430000 |
| C | -26.69990000 | 1.28220000  | -0.94870000 |
| C | -27.67440000 | 2.14130000  | -0.40500000 |
| C | -22.75550000 | 0.73020000  | -0.75600000 |
| C | -22.51150000 | 1.95990000  | -0.10330000 |
| C | -21.23260000 | 2.12290000  | 0.46170000  |
| H | -20.97370000 | 3.03790000  | 0.97070000  |
| C | -20.27200000 | 1.12820000  | 0.39280000  |
| C | -21.80660000 | -0.27610000 | -0.78400000 |
| H | -27.87750000 | 4.00890000  | 0.67630000  |
| H | -25.54330000 | 4.43170000  | 0.90780000  |
| H | -26.99240000 | 0.38960000  | -1.48280000 |
| N | -29.03200000 | 1.85220000  | -0.49110000 |
| H | -19.31150000 | 1.31870000  | 0.85770000  |
| H | -22.04570000 | -1.19700000 | -1.30130000 |
| C | -23.06600000 | 4.31570000  | 0.37240000  |
| C | -23.01560000 | 4.56370000  | 1.88260000  |
| H | -23.75570000 | 5.01820000  | -0.09530000 |
| H | -22.08820000 | 4.51220000  | -0.06790000 |
| H | -22.69930000 | 5.59500000  | 2.06100000  |
| H | -23.98760000 | 4.42470000  | 2.35710000  |
| H | -22.30600000 | 3.90490000  | 2.38450000  |
| N | -23.47280000 | 2.96600000  | -0.05230000 |
| S | -24.22340000 | 0.50450000  | -1.73190000 |
| C | -29.98190000 | 2.92390000  | -0.21950000 |
| C | -29.47300000 | 0.86320000  | -1.46690000 |



|    |              |             |             |
|----|--------------|-------------|-------------|
| H  | -29.89690000 | 3.75580000  | -0.93330000 |
| H  | -29.84720000 | 3.32020000  | 0.78780000  |
| H  | -30.99060000 | 2.51940000  | -0.28070000 |
| H  | -29.25520000 | 1.16410000  | -2.50190000 |
| H  | -30.54880000 | 0.73050000  | -1.36700000 |
| H  | -29.00550000 | -0.10540000 | -1.28480000 |
| C  | -20.53180000 | -0.10380000 | -0.21920000 |
| C  | -14.91700000 | -3.28400000 | -0.16260000 |
| C  | -13.62050000 | -3.64660000 | -0.10010000 |
| C  | -11.09380000 | -4.29640000 | 0.00350000  |
| C  | -10.50770000 | -5.55100000 | -0.08430000 |
| S  | -9.87670000  | -3.04970000 | 0.19230000  |
| C  | -9.11190000  | -5.51090000 | -0.00320000 |
| H  | -11.08980000 | -6.45380000 | -0.20520000 |
| C  | -8.58790000  | -4.23510000 | 0.14810000  |
| H  | -8.47820000  | -6.38690000 | -0.05450000 |
| C  | -7.20300000  | -3.91700000 | 0.24010000  |
| H  | -6.55220000  | -4.78430000 | 0.18780000  |
| C  | -6.66280000  | -2.67590000 | 0.36730000  |
| H  | -7.31230000  | -1.80720000 | 0.41500000  |
| C  | -5.25870000  | -2.38910000 | 0.42620000  |
| C  | -4.23630000  | -3.36630000 | 0.39640000  |
| C  | -4.83220000  | -1.04410000 | 0.51170000  |
| C  | -2.92280000  | -3.00630000 | 0.43560000  |
| H  | -4.46310000  | -4.42140000 | 0.34350000  |
| C  | -3.50790000  | -0.72170000 | 0.54770000  |
| H  | -5.55820000  | -0.24270000 | 0.54310000  |
| H  | -2.11970000  | -3.72430000 | 0.41360000  |
| H  | -3.15100000  | 0.29340000  | 0.60650000  |
| N  | -2.55000000  | -1.69280000 | 0.50510000  |
| C  | -1.15600000  | -1.33600000 | 0.53640000  |
| C  | 0.99380000   | -2.00060000 | 0.44870000  |
| C  | 0.40630000   | 0.27550000  | 0.74360000  |
| C  | 1.41050000   | -0.68240000 | 0.62230000  |
| H  | 1.71480000   | -2.80280000 | 0.34340000  |
| H  | 0.63710000   | 1.32490000  | 0.87900000  |
| N  | -0.88340000  | -0.05240000 | 0.70260000  |
| N  | -0.29310000  | -2.33160000 | 0.40590000  |
| C  | 2.85940000   | -0.36640000 | 0.67020000  |
| O  | 3.73430000   | -1.19750000 | 0.58770000  |
| O  | 3.09970000   | 0.94670000  | 0.81660000  |
| C  | -12.44520000 | -3.96660000 | -0.04890000 |
| C  | -16.08730000 | -2.94540000 | -0.22720000 |
| C  | -17.40990000 | -2.52360000 | -0.30350000 |
| C  | -19.53660000 | -1.16470000 | -0.29650000 |
| C  | -19.72430000 | -2.50390000 | -0.58640000 |
| H  | -20.69870000 | -2.93200000 | -0.77690000 |
| S  | -17.84050000 | -0.84060000 | -0.03120000 |
| C  | -18.54310000 | -3.26350000 | -0.58910000 |
| H  | -18.50440000 | -4.32630000 | -0.78630000 |
| Ti | 10.15770000  | -0.84910000 | -3.59740000 |

|    |             |             |             |
|----|-------------|-------------|-------------|
| O  | 8.40090000  | -0.90680000 | -3.10470000 |
| O  | 11.96420000 | -0.90730000 | -2.61890000 |
| O  | 10.67670000 | -2.49110000 | -4.19090000 |
| O  | 9.20990000  | -1.49880000 | -0.03010000 |
| O  | 8.94580000  | 2.21940000  | 0.53290000  |
| O  | 8.02360000  | 0.43020000  | -0.70970000 |
| O  | 8.06660000  | -3.20160000 | -1.44380000 |
| O  | 11.69610000 | 2.81090000  | -2.05380000 |
| O  | 10.64680000 | 1.05150000  | -3.55610000 |
| Ti | 12.43420000 | 0.52910000  | 0.71680000  |
| O  | 13.42810000 | 0.85280000  | -0.92960000 |
| O  | 10.95940000 | 0.61720000  | -0.55100000 |
| O  | 10.86820000 | -3.65840000 | -1.02660000 |
| O  | 8.46600000  | -3.90380000 | 1.33460000  |
| Ti | 9.36430000  | 0.32680000  | 0.61910000  |
| Ti | 9.96240000  | -0.08900000 | 3.57220000  |
| O  | 11.02190000 | 0.22940000  | 1.96600000  |
| O  | 8.43760000  | 0.03230000  | 2.12460000  |
| Ti | 9.26620000  | -3.32450000 | -0.16890000 |
| Ti | 12.02260000 | 0.91220000  | -1.97870000 |
| Ti | 11.40670000 | -2.68520000 | -2.51200000 |
| O  | 8.15720000  | 2.45430000  | -2.58940000 |
| O  | 6.00270000  | -1.38060000 | -1.13300000 |
| Ti | 7.50520000  | 2.28800000  | -0.92260000 |
| O  | 5.75430000  | 1.98480000  | -0.62180000 |
| Ti | 7.77110000  | -1.33330000 | -1.47640000 |
| Ti | 9.89280000  | 2.79130000  | -3.04230000 |
| O  | 10.16490000 | 4.58970000  | -3.11940000 |
| O  | 7.53950000  | 4.08380000  | -0.33390000 |
| O  | 10.26060000 | 4.78760000  | 0.25180000  |
| O  | 7.90540000  | 3.98290000  | 2.53340000  |
| Ti | 8.74110000  | 3.99410000  | 0.94170000  |
| Ti | 10.89790000 | 4.38410000  | -1.44260000 |
| Ti | 5.30910000  | -1.58850000 | 0.52950000  |
| O  | 6.57970000  | -2.01420000 | 3.41210000  |
| O  | 5.23860000  | -3.29660000 | 1.15310000  |
| O  | 6.34670000  | 1.32490000  | 3.92300000  |
| O  | 5.67350000  | -0.07060000 | 1.52870000  |
| O  | 8.42360000  | -0.36000000 | 4.65660000  |
| Ti | 7.11090000  | -0.26480000 | 3.45450000  |
| Ti | 6.82060000  | -3.20030000 | 2.02820000  |
| Ti | 5.05440000  | 1.60680000  | 1.00690000  |
| O  | 4.78720000  | 3.01750000  | 2.10710000  |
| Ti | 6.38660000  | 2.88740000  | 2.95190000  |
| H  | 4.93390000  | 2.08410000  | -1.36290000 |

D2P4A1@(TiO2)14

|   |             |            |             |
|---|-------------|------------|-------------|
| C | 30.40580000 | 3.72560000 | -0.99460000 |
| C | 29.13930000 | 3.99390000 | -0.49120000 |
| C | 28.31190000 | 2.99230000 | 0.02840000  |

|   |             |             |             |
|---|-------------|-------------|-------------|
| C | 28.83330000 | 1.69290000  | 0.00650000  |
| C | 30.08280000 | 1.40390000  | -0.52670000 |
| C | 30.92450000 | 2.41830000  | -1.02330000 |
| C | 26.27620000 | 0.94610000  | 0.53100000  |
| C | 26.00180000 | 2.33320000  | 0.54780000  |
| C | 24.64300000 | 2.69900000  | 0.58820000  |
| H | 24.35840000 | 3.73890000  | 0.62260000  |
| C | 23.63280000 | 1.75310000  | 0.57120000  |
| C | 25.26240000 | 0.00720000  | 0.47280000  |
| H | 30.98210000 | 4.55680000  | -1.37410000 |
| H | 28.80530000 | 5.01990000  | -0.51520000 |
| H | 30.40740000 | 0.37300000  | -0.52790000 |
| N | 32.20210000 | 2.13990000  | -1.49260000 |
| H | 22.60910000 | 2.10870000  | 0.58880000  |
| H | 25.53270000 | -1.04130000 | 0.45830000  |
| C | 26.68880000 | 4.68350000  | 0.84770000  |
| C | 26.16150000 | 5.51740000  | -0.32380000 |
| H | 27.58940000 | 5.14370000  | 1.25380000  |
| H | 25.95790000 | 4.67880000  | 1.65670000  |
| H | 25.95910000 | 6.53200000  | 0.02940000  |
| H | 26.88130000 | 5.58390000  | -1.14020000 |
| H | 25.23430000 | 5.11440000  | -0.73260000 |
| N | 27.02170000 | 3.27950000  | 0.55270000  |
| S | 27.93730000 | 0.35990000  | 0.76860000  |
| C | 32.88620000 | 3.15530000  | -2.28300000 |
| C | 32.54350000 | 0.75900000  | -1.80870000 |
| H | 33.01010000 | 4.07770000  | -1.71370000 |
| H | 32.35550000 | 3.39400000  | -3.21570000 |
| H | 33.87950000 | 2.78950000  | -2.53690000 |
| H | 32.43400000 | 0.11760000  | -0.93310000 |
| H | 33.58700000 | 0.71880000  | -2.11590000 |
| H | 31.92610000 | 0.34520000  | -2.61900000 |
| C | 23.90790000 | 0.38190000  | 0.49200000  |
| C | 18.15320000 | -2.54660000 | 0.69590000  |
| C | 16.86000000 | -2.88190000 | 0.79910000  |
| C | 9.35690000  | -4.71130000 | 1.35980000  |
| C | 8.76470000  | -5.79120000 | 1.99690000  |
| S | 8.14730000  | -3.68130000 | 0.61870000  |
| C | 7.36920000  | -5.79070000 | 1.89340000  |
| H | 9.34220000  | -6.54390000 | 2.51520000  |
| C | 6.85580000  | -4.71780000 | 1.18030000  |
| H | 6.73040000  | -6.54970000 | 2.32520000  |
| C | 5.46970000  | -4.48050000 | 0.93330000  |
| H | 4.81650000  | -5.23510000 | 1.35960000  |
| C | 4.94000000  | -3.44190000 | 0.23920000  |
| H | 5.59450000  | -2.69150000 | -0.19270000 |
| C | 3.53700000  | -3.23150000 | 0.00610000  |
| C | 2.50850000  | -4.06520000 | 0.50010000  |
| C | 3.12670000  | -2.12190000 | -0.76410000 |
| C | 1.19950000  | -3.79290000 | 0.23280000  |
| H | 2.72420000  | -4.93560000 | 1.10270000  |

|    |              |             |             |
|----|--------------|-------------|-------------|
| C  | 1.80650000   | -1.88240000 | -1.01310000 |
| H  | 3.85990000   | -1.44010000 | -1.17330000 |
| H  | 0.38950000   | -4.40460000 | 0.59460000  |
| H  | 1.46040000   | -1.04620000 | -1.59800000 |
| N  | 0.84180000   | -2.71040000 | -0.51980000 |
| C  | -0.54910000  | -2.44430000 | -0.79170000 |
| C  | -2.70250000  | -3.03950000 | -0.51480000 |
| C  | -2.09080000  | -1.13950000 | -1.79080000 |
| C  | -3.10380000  | -1.95470000 | -1.29100000 |
| H  | -3.43100000  | -3.71910000 | -0.08870000 |
| H  | -2.30950000  | -0.27360000 | -2.40310000 |
| N  | -0.80630000  | -1.38520000 | -1.53990000 |
| N  | -1.42060000  | -3.28810000 | -0.26280000 |
| C  | -4.54740000  | -1.72250000 | -1.54600000 |
| O  | -5.50900000  | -2.49720000 | -1.08550000 |
| O  | -4.76600000  | -0.66210000 | -2.28060000 |
| C  | 15.67400000  | -3.18200000 | 0.89300000  |
| C  | 14.38090000  | -3.50750000 | 0.99080000  |
| C  | 13.19380000  | -3.80070000 | 1.08180000  |
| C  | 11.89340000  | -4.11620000 | 1.17650000  |
| C  | 10.71050000  | -4.40350000 | 1.26700000  |
| C  | 19.33360000  | -2.24340000 | 0.59600000  |
| C  | 20.66780000  | -1.87980000 | 0.48560000  |
| C  | 22.85730000  | -0.62430000 | 0.43350000  |
| C  | 22.96730000  | -1.96610000 | 0.10990000  |
| H  | 23.90540000  | -2.43000000 | -0.16140000 |
| S  | 21.19400000  | -0.22910000 | 0.79250000  |
| C  | 21.75270000  | -2.66640000 | 0.13750000  |
| H  | 21.65170000  | -3.71730000 | -0.09770000 |
| Ti | -9.81430000  | 0.96970000  | 4.15990000  |
| O  | -8.65430000  | 0.06790000  | 2.97060000  |
| O  | -11.77070000 | 1.37320000  | 3.91300000  |
| O  | -10.41910000 | -0.24670000 | 5.47420000  |
| O  | -10.82620000 | -0.87350000 | 0.83630000  |
| O  | -10.08200000 | 2.19140000  | -1.20200000 |
| O  | -8.98100000  | 0.50560000  | 0.14210000  |
| O  | -9.55890000  | -2.51220000 | 2.24390000  |
| O  | -10.97320000 | 4.42420000  | 1.79020000  |
| O  | -9.78660000  | 2.77630000  | 3.27380000  |
| Ti | -13.60780000 | 1.97580000  | 0.65450000  |
| O  | -13.48550000 | 3.04360000  | 2.27000000  |
| O  | -11.69510000 | 1.78170000  | 1.10590000  |
| O  | -12.11200000 | -1.84860000 | 3.18770000  |
| O  | -11.09070000 | -3.68510000 | 0.22430000  |
| Ti | -10.98950000 | 0.67380000  | -0.35200000 |
| Ti | -13.07020000 | -0.19660000 | -2.44020000 |
| O  | -12.93290000 | 0.81280000  | -0.77570000 |
| O  | -11.14950000 | -0.40430000 | -1.96090000 |
| Ti | -11.21720000 | -2.49040000 | 1.65570000  |
| Ti | -11.71290000 | 2.82690000  | 2.62520000  |
| Ti | -11.92130000 | -0.46870000 | 4.41040000  |

|    |              |             |             |
|----|--------------|-------------|-------------|
| O  | -8.00290000  | 3.03930000  | 0.93090000  |
| O  | -7.37970000  | -1.70530000 | 0.76470000  |
| Ti | -8.10930000  | 2.02810000  | -0.51000000 |
| O  | -6.38110000  | 1.23810000  | -0.89780000 |
| Ti | -8.85920000  | -0.87690000 | 1.47190000  |
| Ti | -9.02540000  | 4.16600000  | 2.06000000  |
| O  | -8.85840000  | 5.96790000  | 1.51600000  |
| O  | -7.98350000  | 3.43940000  | -1.82520000 |
| O  | -10.25000000 | 5.04570000  | -1.32370000 |
| O  | -9.52840000  | 2.71100000  | -4.00190000 |
| Ti | -9.66520000  | 3.58490000  | -2.34040000 |
| Ti | -10.34290000 | 5.63240000  | 0.43950000  |
| Ti | -7.25240000  | -2.63460000 | -0.79360000 |
| O  | -10.23940000 | -3.11720000 | -2.79080000 |
| O  | -8.02150000  | -4.29070000 | -0.90370000 |
| O  | -9.60850000  | -0.36030000 | -4.45380000 |
| O  | -7.37120000  | -1.41490000 | -2.21030000 |
| O  | -12.39960000 | -1.33770000 | -3.89320000 |
| Ti | -10.68040000 | -1.46060000 | -3.41860000 |
| Ti | -9.83180000  | -3.88110000 | -1.14740000 |
| Ti | -6.43760000  | 0.07330000  | -2.54480000 |
| O  | -6.82350000  | 0.70300000  | -4.19940000 |
| Ti | -8.61490000  | 1.16320000  | -4.44880000 |
| H  | -5.61830000  | 1.18870000  | -0.29170000 |

D2P2A2@(TiO2)14

|   |             |             |             |
|---|-------------|-------------|-------------|
| C | 16.14390000 | -2.04190000 | 0.19650000  |
| C | 14.94360000 | -2.24120000 | 0.11890000  |
| C | 13.61450000 | -2.46730000 | 0.03890000  |
| C | 12.41590000 | -2.67700000 | -0.03040000 |
| C | 4.72320000  | -2.34000000 | -0.50640000 |
| C | 3.61630000  | -3.23520000 | -0.32170000 |
| C | 4.38000000  | -1.03140000 | -0.79480000 |
| C | 2.24460000  | -2.78380000 | -0.43620000 |
| C | 3.04250000  | -0.59130000 | -0.89840000 |
| H | 5.15680000  | -0.29680000 | -0.96510000 |
| C | 1.94680000  | -1.41670000 | -0.73600000 |
| H | 2.87860000  | 0.45060000  | -1.14450000 |
| C | 0.56770000  | -0.90290000 | -0.86130000 |
| C | 0.24580000  | 0.37480000  | -0.37500000 |
| C | -0.44430000 | -1.65040000 | -1.48220000 |
| C | -1.03450000 | 0.88440000  | -0.50520000 |
| H | 1.00170000  | 0.96510000  | 0.12760000  |
| C | -1.72580000 | -1.13920000 | -1.61820000 |
| H | -0.22380000 | -2.63210000 | -1.87750000 |
| C | -2.03520000 | 0.13320000  | -1.12830000 |
| H | -1.27090000 | 1.86660000  | -0.11670000 |
| H | -2.48530000 | -1.73130000 | -2.11050000 |
| C | -3.39290000 | 0.71610000  | -1.24290000 |
| O | -3.71020000 | 1.81510000  | -0.83670000 |

|   |             |             |             |
|---|-------------|-------------|-------------|
| O | -4.27760000 | -0.09980000 | -1.85450000 |
| N | 3.71770000  | -4.53230000 | -0.01520000 |
| N | 1.35670000  | -3.75880000 | -0.20190000 |
| S | 2.20260000  | -5.11150000 | 0.11790000  |
| C | 8.53950000  | -2.66390000 | -0.28680000 |
| C | 11.04220000 | -2.90200000 | -0.10670000 |
| C | 10.36210000 | -4.10880000 | -0.06210000 |
| H | 10.87500000 | -5.05560000 | 0.04030000  |
| S | 9.90870000  | -1.57800000 | -0.27820000 |
| C | 8.97000000  | -3.97390000 | -0.16260000 |
| H | 8.29060000  | -4.81530000 | -0.14750000 |
| C | 7.21080000  | -2.12020000 | -0.40950000 |
| C | 6.07570000  | -2.85240000 | -0.38290000 |
| H | 7.15060000  | -1.04210000 | -0.52030000 |
| H | 6.14950000  | -3.92540000 | -0.24650000 |
| C | 28.02430000 | 2.47060000  | -0.24010000 |
| C | 26.72120000 | 2.94200000  | -0.34120000 |
| C | 25.63430000 | 2.26950000  | 0.22770000  |
| C | 25.93700000 | 1.08600000  | 0.91310000  |
| C | 27.22940000 | 0.58240000  | 0.99000000  |
| C | 28.31950000 | 1.25880000  | 0.40930000  |
| C | 23.25490000 | 0.67470000  | 0.84680000  |
| C | 23.20120000 | 1.92510000  | 0.19160000  |
| C | 21.96390000 | 2.27880000  | -0.37630000 |
| H | 21.84720000 | 3.22390000  | -0.88330000 |
| C | 20.86680000 | 1.43440000  | -0.31960000 |
| C | 22.16860000 | -0.18270000 | 0.86400000  |
| H | 28.80790000 | 3.05860000  | -0.69500000 |
| H | 26.57050000 | 3.86840000  | -0.87430000 |
| H | 27.38150000 | -0.34180000 | 1.52920000  |
| N | 29.60930000 | 0.74090000  | 0.45660000  |
| H | 19.94840000 | 1.76430000  | -0.79160000 |
| H | 22.26510000 | -1.12880000 | 1.38250000  |
| C | 24.11580000 | 4.16910000  | -0.28050000 |
| C | 24.09140000 | 4.42950000  | -1.78990000 |
| H | 24.91150000 | 4.75390000  | 0.18170000  |
| H | 23.18400000 | 4.51570000  | 0.16750000  |
| H | 23.94120000 | 5.49920000  | -1.95970000 |
| H | 25.02440000 | 4.14160000  | -2.27510000 |
| H | 23.28110000 | 3.89530000  | -2.28730000 |
| N | 24.30780000 | 2.77200000  | 0.14220000  |
| S | 24.67020000 | 0.24020000  | 1.83070000  |
| C | 30.72330000 | 1.63580000  | 0.17010000  |
| C | 29.89400000 | -0.33350000 | 1.39860000  |
| H | 30.79510000 | 2.46510000  | 0.88870000  |
| H | 30.63960000 | 2.05800000  | -0.83220000 |
| H | 31.64960000 | 1.06540000  | 0.20990000  |
| H | 29.76240000 | -0.02560000 | 2.44600000  |
| H | 30.92500000 | -0.65510000 | 1.26130000  |
| H | 29.25340000 | -1.19670000 | 1.21220000  |
| C | 20.93980000 | 0.17400000  | 0.28460000  |

|    |              |             |             |
|----|--------------|-------------|-------------|
| C  | 17.51340000  | -1.80020000 | 0.28900000  |
| C  | 19.80630000  | -0.74300000 | 0.32770000  |
| C  | 19.81030000  | -2.10450000 | 0.55570000  |
| H  | 20.71870000  | -2.66920000 | 0.71590000  |
| S  | 18.16810000  | -0.18100000 | 0.08920000  |
| C  | 18.53480000  | -2.69740000 | 0.53430000  |
| H  | 18.35360000  | -3.75330000 | 0.68390000  |
| Ti | -9.54310000  | -2.07510000 | 3.19910000  |
| O  | -7.92060000  | -1.80350000 | 2.40760000  |
| O  | -11.50770000 | -1.96990000 | 2.60440000  |
| O  | -9.89160000  | -3.86130000 | 3.27370000  |
| O  | -9.31750000  | -1.40930000 | -0.48220000 |
| O  | -9.26340000  | 2.29170000  | 0.23310000  |
| O  | -8.06630000  | 0.28360000  | 0.59430000  |
| O  | -7.87160000  | -3.37290000 | 0.02620000  |
| O  | -11.45000000 | 1.73210000  | 3.31700000  |
| O  | -10.07690000 | -0.32280000 | 3.90460000  |
| Ti | -12.67490000 | 0.44590000  | 0.11190000  |
| O  | -13.32440000 | 0.10990000  | 1.91970000  |
| O  | -10.97750000 | 0.24190000  | 1.04340000  |
| O  | -10.68780000 | -3.92030000 | -0.00890000 |
| O  | -8.80510000  | -3.14310000 | -2.70290000 |
| Ti | -9.64420000  | 0.50590000  | -0.42300000 |
| Ti | -10.81440000 | 1.04440000  | -3.17840000 |
| O  | -11.53620000 | 0.71070000  | -1.39750000 |
| O  | -9.03280000  | 0.81630000  | -2.07890000 |
| Ti | -9.30000000  | -3.17390000 | -0.97350000 |
| Ti | -11.73830000 | -0.05470000 | 2.65240000  |
| Ti | -10.93980000 | -3.55140000 | 1.79220000  |
| O  | -7.86810000  | 1.54460000  | 3.04760000  |
| O  | -5.95790000  | -1.37080000 | -0.00550000 |
| Ti | -7.56120000  | 2.00370000  | 1.33700000  |
| O  | -5.89990000  | 1.98040000  | 0.63880000  |
| Ti | -7.62140000  | -1.60340000 | 0.64690000  |
| Ti | -9.48460000  | 1.55040000  | 3.89470000  |
| O  | -9.77960000  | 3.18720000  | 4.63490000  |
| O  | -7.75740000  | 3.88180000  | 1.41990000  |
| O  | -10.55720000 | 4.48710000  | 1.61510000  |
| O  | -8.69070000  | 4.70860000  | -1.18980000 |
| Ti | -9.18880000  | 4.11200000  | 0.43130000  |
| Ti | -10.83000000 | 3.48540000  | 3.15200000  |
| Ti | -5.60840000  | -0.94820000 | -1.73400000 |
| O  | -7.42260000  | -0.50440000 | -4.30620000 |
| O  | -5.62310000  | -2.33690000 | -2.91000000 |
| O  | -7.37920000  | 2.82060000  | -3.66800000 |
| O  | -6.20360000  | 0.77540000  | -2.06530000 |
| O  | -9.51940000  | 1.29290000  | -4.54890000 |
| Ti | -7.99420000  | 1.10250000  | -3.64620000 |
| Ti | -7.35080000  | -2.10060000 | -3.39680000 |
| Ti | -5.53340000  | 2.23260000  | -1.11840000 |
| O  | -5.52790000  | 3.94760000  | -1.69380000 |

|    |             |            |             |
|----|-------------|------------|-------------|
| Ti | -7.26100000 | 3.95970000 | -2.22760000 |
| H  | -4.94980000 | 1.90230000 | 1.20720000  |

D2P4A2@(TiO2)14

|   |              |             |             |
|---|--------------|-------------|-------------|
| C | -30.57610000 | -3.37290000 | -1.04340000 |
| C | -29.23300000 | -3.67930000 | -1.22380000 |
| C | -28.22240000 | -3.10500000 | -0.44530000 |
| C | -28.64470000 | -2.20140000 | 0.53820000  |
| C | -29.97980000 | -1.85710000 | 0.70570000  |
| C | -30.99330000 | -2.42910000 | -0.08750000 |
| C | -26.01520000 | -1.55060000 | 0.69360000  |
| C | -25.83370000 | -2.55010000 | -0.28910000 |
| C | -24.56100000 | -2.61340000 | -0.88630000 |
| H | -24.34510000 | -3.36140000 | -1.63270000 |
| C | -23.55440000 | -1.72320000 | -0.55310000 |
| C | -25.01900000 | -0.63890000 | 0.99330000  |
| H | -31.29470000 | -3.87160000 | -1.67710000 |
| H | -28.98930000 | -4.39720000 | -1.99200000 |
| H | -30.22580000 | -1.14420000 | 1.47990000  |
| N | -32.32540000 | -2.05970000 | 0.05420000  |
| H | -22.60380000 | -1.82230000 | -1.06410000 |
| H | -25.21560000 | 0.10720000  | 1.75300000  |
| C | -26.52410000 | -4.62590000 | -1.43070000 |
| C | -26.46060000 | -4.42040000 | -2.94720000 |
| H | -27.26590000 | -5.38780000 | -1.19120000 |
| H | -25.56860000 | -5.00740000 | -1.06960000 |
| H | -26.22290000 | -5.37620000 | -3.42210000 |
| H | -27.40810000 | -4.06910000 | -3.35680000 |
| H | -25.69040000 | -3.70380000 | -3.23470000 |
| N | -26.85200000 | -3.43890000 | -0.62310000 |
| S | -27.47510000 | -1.54780000 | 1.70720000  |
| C | -33.34790000 | -2.91130000 | -0.53940000 |
| C | -32.72490000 | -1.33570000 | 1.25390000  |
| H | -33.36540000 | -3.91970000 | -0.10170000 |
| H | -33.20020000 | -3.00800000 | -1.61590000 |
| H | -34.32160000 | -2.45050000 | -0.38160000 |
| H | -32.56850000 | -1.91890000 | 2.17270000  |
| H | -33.78290000 | -1.09060000 | 1.17830000  |
| H | -32.17580000 | -0.39730000 | 1.34630000  |
| C | -23.75590000 | -0.69900000 | 0.38050000  |
| C | -18.06670000 | 2.32080000  | 0.90230000  |
| C | -16.78740000 | 2.72040000  | 0.85240000  |
| C | -15.61760000 | 3.08590000  | 0.80110000  |
| C | -14.34180000 | 3.48560000  | 0.74670000  |
| C | -13.17350000 | 3.85440000  | 0.69370000  |
| C | -11.89490000 | 4.25740000  | 0.63620000  |
| C | -10.73350000 | 4.63200000  | 0.58290000  |
| C | -19.23410000 | 1.96130000  | 0.95070000  |
| C | -20.55590000 | 1.53760000  | 0.99490000  |
| C | -22.72020000 | 0.26760000  | 0.71920000  |



|    |              |             |             |
|----|--------------|-------------|-------------|
| C  | -22.84710000 | 1.45400000  | 1.41950000  |
| H  | -23.79350000 | 1.81360000  | 1.79900000  |
| S  | -21.05530000 | 0.02530000  | 0.24770000  |
| C  | -21.64580000 | 2.16260000  | 1.57490000  |
| H  | -21.56190000 | 3.11180000  | 2.08660000  |
| C  | -3.49230000  | 3.49980000  | -0.38870000 |
| C  | -2.43260000  | 4.46770000  | -0.30060000 |
| C  | -3.08710000  | 2.20980000  | -0.68620000 |
| C  | -1.05130000  | 4.08520000  | -0.53130000 |
| C  | -1.74180000  | 1.83960000  | -0.90370000 |
| H  | -3.84370000  | 1.43790000  | -0.76550000 |
| C  | -0.69470000  | 2.73390000  | -0.84720000 |
| H  | -1.53870000  | 0.80440000  | -1.14870000 |
| C  | 0.69960000   | 2.30990000  | -1.09140000 |
| C  | 1.15650000   | 1.07860000  | -0.59530000 |
| C  | 1.58830000   | 3.09660000  | -1.83870000 |
| C  | 2.45020000   | 0.64980000  | -0.83840000 |
| H  | 0.49690000   | 0.46200000  | 0.00220000  |
| C  | 2.88220000   | 2.66590000  | -2.08820000 |
| H  | 1.26030000   | 4.04370000  | -2.24430000 |
| C  | 3.32720000   | 1.43850000  | -1.58820000 |
| H  | 2.79300000   | -0.29720000 | -0.44200000 |
| H  | 3.54540000   | 3.28520000  | -2.67680000 |
| C  | 4.70360000   | 0.94100000  | -1.82450000 |
| O  | 5.16900000   | -0.20360000 | -1.38520000 |
| O  | 5.43550000   | 1.75670000  | -2.52450000 |
| N  | -2.56750000  | 5.76140000  | 0.00340000  |
| N  | -0.19820000  | 5.10390000  | -0.38150000 |
| S  | -1.07670000  | 6.41760000  | 0.00180000  |
| C  | -6.90380000  | 5.16210000  | 0.28220000  |
| C  | -9.40770000  | 5.04600000  | 0.51940000  |
| C  | -8.89610000  | 6.32000000  | 0.69240000  |
| H  | -9.52730000  | 7.17140000  | 0.90730000  |
| S  | -8.11300000  | 3.90250000  | 0.18550000  |
| C  | -7.50040000  | 6.37940000  | 0.56080000  |
| H  | -6.92440000  | 7.28970000  | 0.66360000  |
| C  | -5.49430000  | 4.94720000  | 0.09570000  |
| C  | -4.90260000  | 3.76630000  | -0.19230000 |
| H  | -4.89150000  | 5.84000000  | 0.20480000  |
| H  | -5.52510000  | 2.88150000  | -0.30080000 |
| Ti | 10.33450000  | 1.52960000  | 3.52620000  |
| O  | 9.06840000   | 1.60800000  | 2.12460000  |
| O  | 12.22880000  | 0.85380000  | 3.44680000  |
| O  | 11.14250000  | 3.22690000  | 3.72440000  |
| O  | 10.98950000  | 0.76970000  | -0.27650000 |
| O  | 9.88580000   | -2.79470000 | 0.14770000  |
| O  | 9.02310000   | -0.53310000 | 0.19790000  |
| O  | 9.96830000   | 3.05220000  | -0.13540000 |
| O  | 11.06220000  | -2.74670000 | 3.80110000  |
| O  | 10.13080000  | -0.41830000 | 3.98900000  |
| Ti | 13.62130000  | -1.84510000 | 1.18130000  |

|    |             |             |             |
|----|-------------|-------------|-------------|
| O  | 13.66310000 | -1.64810000 | 3.11110000  |
| O  | 11.78830000 | -1.20820000 | 1.54760000  |
| O  | 12.59350000 | 2.85570000  | 0.82330000  |
| O  | 11.27730000 | 2.53310000  | -2.54750000 |
| Ti | 10.94670000 | -1.18700000 | -0.22490000 |
| Ti | 12.78040000 | -2.04150000 | -2.53890000 |
| O  | 12.81570000 | -1.76720000 | -0.60720000 |
| O  | 10.94350000 | -1.37570000 | -2.15920000 |
| Ti | 11.53820000 | 2.49030000  | -0.69740000 |
| Ti | 11.95780000 | -1.06880000 | 3.37890000  |
| Ti | 12.50710000 | 2.57290000  | 2.65300000  |
| O  | 8.06000000  | -1.89490000 | 2.48180000  |
| O  | 7.59350000  | 1.73720000  | -0.60340000 |
| Ti | 8.02220000  | -2.02470000 | 0.72350000  |
| O  | 6.28890000  | -1.47110000 | 0.05220000  |
| Ti | 9.11870000  | 1.38000000  | 0.35650000  |
| Ti | 9.17390000  | -2.16990000 | 3.98950000  |
| O  | 8.87500000  | -3.88540000 | 4.72320000  |
| O  | 7.68190000  | -3.92440000 | 0.61250000  |
| O  | 9.93350000  | -5.09580000 | 1.84820000  |
| O  | 8.96820000  | -4.88680000 | -1.64010000 |
| Ti | 9.27970000  | -4.53900000 | 0.18320000  |
| Ti | 10.22470000 | -4.45770000 | 3.57140000  |
| Ti | 7.30640000  | 1.49560000  | -2.38310000 |
| O  | 10.03600000 | 0.30090000  | -4.44840000 |
| O  | 8.11520000  | 2.62520000  | -3.57310000 |
| O  | 9.10260000  | -2.80270000 | -3.93840000 |
| O  | 7.20280000  | -0.34570000 | -2.71160000 |
| O  | 11.97560000 | -1.99540000 | -4.33140000 |
| Ti | 10.33460000 | -1.41970000 | -3.91640000 |
| Ti | 9.86490000  | 1.96230000  | -3.63550000 |
| Ti | 6.18150000  | -1.60570000 | -1.95840000 |
| O  | 6.33440000  | -3.16790000 | -2.86340000 |
| Ti | 8.06280000  | -3.87140000 | -2.89680000 |
| H  | 5.61000000  | -0.97240000 | 0.54450000  |

D2P2A3@(TiO2)14

|   |            |             |             |
|---|------------|-------------|-------------|
| C | 4.87370000 | -4.16890000 | 1.02450000  |
| C | 4.12160000 | -5.16410000 | 1.63780000  |
| S | 3.86960000 | -3.13000000 | 0.04910000  |
| C | 2.75460000 | -5.07330000 | 1.33690000  |
| H | 4.56200000 | -5.91390000 | 2.28350000  |
| C | 2.42810000 | -4.01920000 | 0.48650000  |
| H | 2.00220000 | -5.75050000 | 1.72600000  |
| C | 8.73960000 | -3.35930000 | 1.19090000  |
| C | 7.43560000 | -3.68490000 | 1.14560000  |
| C | 1.10760000 | -3.71640000 | 0.06010000  |
| H | 0.34560000 | -4.38260000 | 0.46560000  |
| C | 0.67420000 | -2.71360000 | -0.76270000 |
| C | 6.24250000 | -3.93950000 | 1.10110000  |

|    |             |             |             |
|----|-------------|-------------|-------------|
| C  | 9.92080000  | -3.02880000 | 1.22890000  |
| C  | 1.56860000  | -1.78450000 | -1.36310000 |
| N  | 2.30050000  | -1.03270000 | -1.84750000 |
| C  | -0.74810000 | -2.47760000 | -1.08770000 |
| O  | -1.13130000 | -1.49960000 | -1.86340000 |
| O  | -1.60380000 | -3.29180000 | -0.52500000 |
| C  | 21.15850000 | 2.34970000  | -1.12950000 |
| C  | 19.81810000 | 2.58500000  | -1.36840000 |
| C  | 18.80240000 | 2.04730000  | -0.54690000 |
| C  | 19.23040000 | 1.25610000  | 0.54530000  |
| C  | 20.56330000 | 0.98040000  | 0.77870000  |
| C  | 21.58560000 | 1.51450000  | -0.05680000 |
| C  | 16.62720000 | 0.53360000  | 0.71260000  |
| C  | 16.43420000 | 1.41940000  | -0.37720000 |
| C  | 15.17100000 | 1.38040000  | -1.00800000 |
| H  | 14.95080000 | 2.03960000  | -1.83860000 |
| C  | 14.18330000 | 0.50040000  | -0.60080000 |
| C  | 15.65500000 | -0.37560000 | 1.09230000  |
| H  | 21.87970000 | 2.81000000  | -1.79720000 |
| H  | 19.56720000 | 3.21450000  | -2.21510000 |
| H  | 20.81630000 | 0.35810000  | 1.63150000  |
| N  | 22.91420000 | 1.21510000  | 0.15050000  |
| H  | 13.23800000 | 0.51410000  | -1.13880000 |
| H  | 15.85610000 | -1.03250000 | 1.93530000  |
| C  | 17.08520000 | 3.40260000  | -1.72310000 |
| C  | 17.06650000 | 3.02730000  | -3.20690000 |
| H  | 17.79750000 | 4.21850000  | -1.55290000 |
| H  | 16.10400000 | 3.79000000  | -1.42380000 |
| H  | 16.79160000 | 3.91090000  | -3.79210000 |
| H  | 18.04030000 | 2.68230000  | -3.56040000 |
| H  | 16.33910000 | 2.24270000  | -3.42610000 |
| N  | 17.43630000 | 2.30860000  | -0.78680000 |
| S  | 18.05800000 | 0.68670000  | 1.74460000  |
| C  | 23.92850000 | 2.03510000  | -0.50910000 |
| C  | 23.31190000 | 0.62050000  | 1.42460000  |
| H  | 23.89840000 | 3.08720000  | -0.18040000 |
| H  | 23.81120000 | 2.01490000  | -1.59830000 |
| H  | 24.92040000 | 1.63430000  | -0.28150000 |
| H  | 23.11620000 | 1.28790000  | 2.28050000  |
| H  | 24.38310000 | 0.40060000  | 1.40130000  |
| H  | 22.78970000 | -0.32600000 | 1.60370000  |
| C  | 14.39780000 | -0.41640000 | 0.44850000  |
| C  | 13.38650000 | -1.35600000 | 0.86420000  |
| C  | 13.52240000 | -2.48820000 | 1.68130000  |
| S  | 11.72210000 | -1.16970000 | 0.35810000  |
| C  | 12.33400000 | -3.18540000 | 1.89130000  |
| H  | 14.47190000 | -2.80610000 | 2.09970000  |
| C  | 11.22940000 | -2.61060000 | 1.24470000  |
| H  | 12.25500000 | -4.08800000 | 2.48950000  |
| Ti | -5.70780000 | 1.20300000  | 4.07620000  |
| O  | -4.59190000 | 0.11430000  | 2.99620000  |

|    |             |             |             |
|----|-------------|-------------|-------------|
| O  | -7.65740000 | 1.66250000  | 3.78780000  |
| O  | -6.35770000 | 0.15880000  | 5.51790000  |
| O  | -6.83490000 | -0.95910000 | 0.97250000  |
| O  | -5.95430000 | 1.83260000  | -1.40590000 |
| O  | -4.91610000 | 0.25160000  | 0.12720000  |
| O  | -5.62850000 | -2.50230000 | 2.57120000  |
| O  | -6.72560000 | 4.43320000  | 1.32290000  |
| O  | -5.60160000 | 2.89980000  | 2.99360000  |
| Ti | -9.48470000 | 1.99420000  | 0.47230000  |
| O  | -9.30750000 | 3.23310000  | 1.96480000  |
| O  | -7.56820000 | 1.75320000  | 0.93920000  |
| O  | -8.15100000 | -1.60660000 | 3.43070000  |
| O  | -7.25260000 | -3.81410000 | 0.67380000  |
| Ti | -6.92900000 | 0.45830000  | -0.38710000 |
| Ti | -9.06400000 | -0.54450000 | -2.37610000 |
| O  | -8.87790000 | 0.64150000  | -0.83060000 |
| O  | -7.14150000 | -0.79020000 | -1.87290000 |
| Ti | -7.29660000 | -2.45750000 | 1.97320000  |
| Ti | -7.53730000 | 2.96710000  | 2.33780000  |
| Ti | -7.89060000 | -0.10400000 | 4.50060000  |
| O  | -3.81040000 | 2.81580000  | 0.62820000  |
| O  | -3.40900000 | -1.96220000 | 1.00130000  |
| Ti | -3.97490000 | 1.65890000  | -0.69560000 |
| O  | -2.28300000 | 0.74740000  | -0.99650000 |
| Ti | -4.85030000 | -0.98760000 | 1.61270000  |
| Ti | -4.78180000 | 4.10950000  | 1.62880000  |
| O  | -4.52590000 | 5.82790000  | 0.87410000  |
| O  | -3.78340000 | 2.91440000  | -2.16720000 |
| O  | -5.98460000 | 4.67150000  | -1.84680000 |
| O  | -5.39330000 | 2.00840000  | -4.25350000 |
| Ti | -5.47310000 | 3.07450000  | -2.69500000 |
| Ti | -6.04410000 | 5.46300000  | -0.15180000 |
| Ti | -3.36270000 | -3.06320000 | -0.45980000 |
| O  | -6.39540000 | -3.63580000 | -2.40720000 |
| O  | -4.24380000 | -4.68350000 | -0.38900000 |
| O  | -5.63240000 | -1.10340000 | -4.37370000 |
| O  | -3.43490000 | -1.99890000 | -2.00470000 |
| O  | -8.46680000 | -1.87780000 | -3.70540000 |
| Ti | -6.74970000 | -2.02900000 | -3.21510000 |
| Ti | -6.02240000 | -4.22190000 | -0.67910000 |
| Ti | -2.41850000 | -0.60110000 | -2.51030000 |
| O  | -2.79810000 | -0.13780000 | -4.23380000 |
| Ti | -4.56410000 | 0.37010000  | -4.52710000 |
| H  | -1.51510000 | 0.72690000  | -0.39310000 |

D2P4A3@(TiO2)14

|   |             |             |             |
|---|-------------|-------------|-------------|
| C | -3.52280000 | -3.61030000 | -0.74960000 |
| C | -2.78060000 | -4.67280000 | -1.24770000 |
| S | -2.50510000 | -2.45460000 | 0.07740000  |
| C | -1.41860000 | -4.55860000 | -0.96750000 |

|   |              |             |             |
|---|--------------|-------------|-------------|
| H | -3.23090000  | -5.49130000 | -1.79110000 |
| C | -1.07660000  | -3.41490000 | -0.25350000 |
| H | -0.67530000  | -5.28460000 | -1.26980000 |
| C | -12.46820000 | -2.10880000 | -1.18570000 |
| C | -11.15000000 | -2.34020000 | -1.14110000 |
| C | 0.25650000   | -3.11180000 | 0.13260000  |
| H | 0.97330000   | -3.86450000 | -0.17670000 |
| C | 0.76850000   | -2.04600000 | 0.81620000  |
| C | -9.94140000  | -2.54740000 | -1.09770000 |
| C | -8.62560000  | -2.77510000 | -1.03960000 |
| C | -7.41840000  | -2.98090000 | -0.98200000 |
| C | -6.09730000  | -3.20150000 | -0.91010000 |
| C | -4.89590000  | -3.40260000 | -0.84240000 |
| C | -13.67420000 | -1.90660000 | -1.21770000 |
| C | -0.03310000  | -0.97000000 | 1.28730000  |
| N | -0.69220000  | -0.10130000 | 1.66620000  |
| C | 2.20890000   | -1.91770000 | 1.12280000  |
| O | 2.72430000   | -0.89870000 | 1.76660000  |
| O | 2.92860000   | -2.92500000 | 0.68910000  |
| C | -25.52740000 | 1.87520000  | 1.27460000  |
| C | -24.23900000 | 2.39410000  | 1.28620000  |
| C | -23.21810000 | 1.88390000  | 0.47700000  |
| C | -23.57200000 | 0.81360000  | -0.35410000 |
| C | -24.84600000 | 0.26110000  | -0.35080000 |
| C | -25.86930000 | 0.77270000  | 0.47080000  |
| C | -20.89240000 | 0.55620000  | -0.71560000 |
| C | -20.79230000 | 1.68630000  | 0.12850000  |
| C | -19.49740000 | 2.02390000  | 0.56670000  |
| H | -19.34140000 | 2.88460000  | 1.19780000  |
| C | -18.39050000 | 1.27180000  | 0.21500000  |
| C | -19.78870000 | -0.21610000 | -1.02710000 |
| H | -26.26050000 | 2.33730000  | 1.91960000  |
| H | -24.04870000 | 3.22720000  | 1.94550000  |
| H | -25.04020000 | -0.56790000 | -1.01620000 |
| N | -27.13560000 | 0.20150000  | 0.49930000  |
| H | -17.42530000 | 1.59050000  | 0.59160000  |
| H | -19.92950000 | -1.07700000 | -1.66840000 |
| C | -21.71130000 | 3.75900000  | 1.09970000  |
| C | -21.48540000 | 3.77220000  | 2.61410000  |
| H | -22.58480000 | 4.36180000  | 0.85070000  |
| H | -20.86600000 | 4.22760000  | 0.59550000  |
| H | -21.33850000 | 4.80590000  | 2.93870000  |
| H | -22.33610000 | 3.36770000  | 3.16370000  |
| H | -20.60260000 | 3.20240000  | 2.90670000  |
| N | -21.90900000 | 2.43850000  | 0.47790000  |
| S | -22.41650000 | 0.19660000  | -1.55570000 |
| C | -28.22750000 | 0.96680000  | 1.08740000  |
| C | -27.51550000 | -0.71100000 | -0.57130000 |
| H | -28.43420000 | 1.89790000  | 0.54060000  |
| H | -28.01440000 | 1.21940000  | 2.12680000  |
| H | -29.12790000 | 0.35490000  | 1.07650000  |

|    |              |             |             |
|----|--------------|-------------|-------------|
| H  | -27.54110000 | -0.22240000 | -1.55590000 |
| H  | -28.50740000 | -1.10580000 | -0.35790000 |
| H  | -26.83050000 | -1.55840000 | -0.62580000 |
| C  | -18.50060000 | 0.12100000  | -0.57590000 |
| C  | -17.35010000 | -0.69530000 | -0.93290000 |
| C  | -17.32480000 | -1.88630000 | -1.63980000 |
| S  | -15.72740000 | -0.23740000 | -0.47450000 |
| C  | -16.04340000 | -2.42620000 | -1.81350000 |
| H  | -18.21670000 | -2.36420000 | -2.02010000 |
| C  | -15.03870000 | -1.66350000 | -1.24170000 |
| H  | -15.83910000 | -3.35040000 | -2.33720000 |
| Ti | 7.50260000   | 0.53470000  | -4.13040000 |
| O  | 6.28830000   | -0.33390000 | -2.97090000 |
| O  | 9.43630000   | 0.97820000  | -3.79080000 |
| O  | 8.19710000   | -0.72660000 | -5.35500000 |
| O  | 8.34690000   | -1.15110000 | -0.67900000 |
| O  | 7.44800000   | 1.98510000  | 1.18080000  |
| O  | 6.44740000   | 0.22750000  | -0.14990000 |
| O  | 7.18330000   | -2.86690000 | -2.08430000 |
| O  | 8.47960000   | 4.10330000  | -1.84950000 |
| O  | 7.40110000   | 2.37640000  | -3.32560000 |
| Ti | 11.07650000  | 1.74560000  | -0.46270000 |
| O  | 11.03280000  | 2.74240000  | -2.12690000 |
| O  | 9.19530000   | 1.50330000  | -1.01270000 |
| O  | 9.77720000   | -2.20460000 | -2.90990000 |
| O  | 8.61230000   | -3.93020000 | 0.06710000  |
| Ti | 8.42200000   | 0.44710000  | 0.44920000  |
| Ti | 10.39120000  | -0.30270000 | 2.68710000  |
| O  | 10.33610000  | 0.63360000  | 0.97570000  |
| O  | 8.50380000   | -0.55990000 | 2.10940000  |
| Ti | 8.80490000   | -2.79500000 | -1.40490000 |
| Ti | 9.28630000   | 2.48380000  | -2.57200000 |
| Ti | 9.63880000   | -0.88050000 | -4.19950000 |
| O  | 5.48320000   | 2.71030000  | -1.10060000 |
| O  | 4.91290000   | -2.03210000 | -0.76660000 |
| Ti | 5.52020000   | 1.76240000  | 0.38610000  |
| O  | 3.78310000   | 0.96300000  | 0.70920000  |
| Ti | 6.41960000   | -1.21160000 | -1.42390000 |
| Ti | 6.55380000   | 3.80410000  | -2.21750000 |
| O  | 6.33280000   | 5.62450000  | -1.76160000 |
| O  | 5.30130000   | 3.22570000  | 1.63030000  |
| O  | 7.57180000   | 4.84410000  | 1.18910000  |
| O  | 6.72870000   | 2.61340000  | 3.92000000  |
| Ti | 6.94890000   | 3.41870000  | 2.23300000  |
| Ti | 7.75770000   | 5.35740000  | -0.58940000 |
| Ti | 4.70900000   | -2.89680000 | 0.82050000  |
| O  | 7.58310000   | -3.24890000 | 3.00220000  |
| O  | 5.49180000   | -4.53470000 | 1.04480000  |
| O  | 6.82260000   | -0.43450000 | 4.50700000  |
| O  | 4.73070000   | -1.61680000 | 2.18800000  |
| O  | 9.65360000   | -1.39170000 | 4.14750000  |

|    |            |             |            |
|----|------------|-------------|------------|
| Ti | 7.96590000 | -1.56080000 | 3.58230000 |
| Ti | 7.27980000 | -4.08760000 | 1.37270000 |
| Ti | 3.76060000 | -0.13040000 | 2.40520000 |
| O  | 4.04310000 | 0.57430000  | 4.05040000 |
| Ti | 5.81130000 | 1.07200000  | 4.38070000 |
| H  | 3.05680000 | 0.87640000  | 0.06360000 |
